# Supplementary material for: Practical carbocatalysis by graphene oxide nanosheets in aqueous medium towards the synthesis of diversified dibenzo[1,4]diazepine scaffolds
Source: Royal Society of Chemistry journal article supplement (doi:10.1039/c6ra17520a), 2016-01-01
Supplement: c6ra17520a1.pdf [file c6ra17520a1.pdf]

## A practical carbocatalysis by Graphene Oxide nanosheets in aqueous medium towards the synthesis of diversified dibenzo[1,4]diazepine scaffold

Nazia Kausar, Prasun Mukherjee, Asish R. Das\*

*Department of Chemistry, University of Calcutta, Kolkata-700009, India*

\*Corresponding author. Tel.: +913323501014, +919433120265; fax: +913323519754;

E-mail address: [ardchem@caluniv.ac.in](mailto:ardchem@caluniv.ac.in), [ardas66@rediffmail.com](mailto:ardas66@rediffmail.com) (A R Das)

| <b><u>Content</u></b>                                                                | <b><u>Page Numbers</u></b> |
|--------------------------------------------------------------------------------------|----------------------------|
| Materials and Method                                                                 | 2                          |
| General Procedure for the synthesis of derivatives                                   | 3-4                        |
| Physical Characterization data of the synthesized compounds                          | 5-20                       |
| <sup>1</sup> HNMR & <sup>13</sup> CNMR and HRMS Spectra of the synthesized compounds | 21-46                      |

## Materials and Methods

$^1\text{H}$ -NMR and  $^{13}\text{C}$ -NMR spectral analysis were carried out on Bruker-Advance Digital 300 MHz and 75 MHz instruments where tetramethylsilane (TMS) was used as internal standard. Infrared spectra were recorded in KBr pellets in reflection mode on a Perkin Elmer RX-1 FTIR spectrophotometer. Melting points were determined on a Köfler Block apparatus and are uncorrected. Synthetic grade chemicals from Sigma-Aldrich, Spectrochem and E-Merck were used for carrying out the organic reactions. Elemental analyses were done using an autoanalyzer. Mass spectra (ESI-MS) of compound **4c** and **4t** were recorded on Waters Xevo G-2 SQ TOF electrospray ionization mass spectrophotometer. The morphology of synthesized GO was characterized using a transmission electron microscope (TEM-JEOL-JEM-2100 with a 200 kV accelerating voltage) and field emission scanning electron microscopy (FESEM-ZEISS Auriga instrument). Samples for TEM analysis were prepared by drying a droplet of material suspension on a carbon coated copper grid. FESEM samples were prepared by drying a droplet of the suspension on a silicon substrate coated with gold in the sputters coater. X-ray diffraction (XRD) patterns were recorded on an X-PERT-PRO Panalytical diffractometer using Cu K $\alpha$  ( $\lambda=1.5406$ ) as the X-ray source at a scanning rate of  $1^\circ/\text{min}$  and generator voltage of 40 kV and current of 30 mA. The Fourier transform infrared (FTIR) spectroscopic experiments of GO were performed with a Bruker-Optics Alpha-T spectrophotometer over the range 400 to  $4000\text{ cm}^{-1}$ .

## **Experimental:**

### **Preparation of GO nanosheets:**

Natural graphite powder was used for the synthesis of the GO nanosheets. Graphite powder (1000 mg) and NaNO<sub>3</sub> (1000 mg) were added to 35 ml of concentrated H<sub>2</sub>SO<sub>4</sub> (98%) under vigorous stirring in a 250 ml conical flask placed in an ice bath. The whole mass was converted to a black slurry (which takes 2 min), then KMnO<sub>4</sub> (5000 mg) was added slowly to the slurry while maintaining the reaction temperature between 15 °C and 20 °C. After 3 h, the entire system was taken out of the ice bath and the mixture diluted with 100 ml of water and then further stirred for 3 h at ambient temperature. 200 ml of hot water was added to the above reaction mixture followed by 30% H<sub>2</sub>O<sub>2</sub>, until the excess permanganate and manganese dioxide had been reduced to colourless soluble manganese sulfate. The resultant yellow precipitate was washed with distilled water several times and then was subjected to centrifugation to obtain the pure graphene oxide powder. After repeated centrifugation, salts and ions resulting from the oxidation process can be removed from the GO suspension. The GO nanosheet sample was collected and dried at 60 °C for 24 h. The GO nanosheets were characterized using XRD, FTIR, and FESEM and TEM images.

### **Synthesis of dibenzo[1,4]diazepine**

o-Phenylenediamine (1 mmol), 1,3-dicarbonyl compound (1 mmol) and aldehyde/ketone derivatives (1 mmol) were stirred in water (5 ml) in presence of GO nanosheets (15 mg) at 70°C. After completion of reaction (indicated by TLC), the reaction mixture was extracted with ethyl acetate (2 x 3 ml). Solvent (ethyl acetate) removal followed by column chromatography (eluent: ethyl acetate/petroleum ether 1:5) led to the pure products. GO nanosheet, which is completely

insoluble in ethyl acetate remains at aqueous layer. GO nanosheets can be recycled from the aqueous layer through evaporation of water. GO thus obtained can be used further after proper drying. All compounds were well characterized by  $^1\text{H}$ ,  $^{13}\text{C}$  NMR and FT-IR analysis.

**Hot filtration test for leaching of GO nanosheets:**

Leaching of GO nanosheets was studied by performing hot filtration test of compound **4p** under optimized condition. During this test, the GO nanosheets were removed from the reaction mixture by filtration after 30 min of the reaction and the filtrate was monitored for continued activity. It was found that after removal of the catalyst, the reaction proceeded negligibly (approx. 1%). Yield of the compound after 30 min of reaction (with GO catalyst): 40.8% (0.147 mg)

Yield of the compound after 60 min of reaction (GO was removed after 30 min): 41.9% (0.151 mg).

This observation indicates that almost no catalytically active GO remained in filtrate and hence indicates no significant leaching of the catalyst.

**3,3-dimethyl-11-phenyl-2,3,4,5,10,11-hexahydro-1*H*-dibenzo[*b,e*][1,4]diazepin-1-one (4a)**

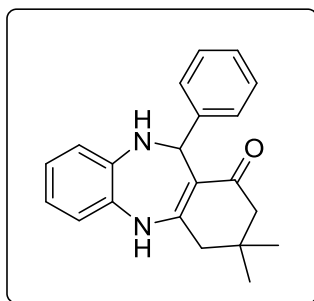

**Yield:** 90% (0.286 g)

**Characteristic:** Pale green solid

**Mp:** 248-250 °C

**IR (KBr):** 3293, 3239, 3056, 2951, 1680, 1275 cm<sup>-1</sup>;

**<sup>1</sup>H NMR (300 MHz, DMSO-d<sub>6</sub>):** δ 0.86 (6H, s), 1.71 (2H, s), 2.22 (2H, s), 5.06 (1H, d, *J*=4.5 Hz), 6.97-7.08 (3H, m), 7.28-7.39 (2H, m), 7.55 (2H, d, *J*= 8.7 Hz), 7.76 (1H, d, *J*= 7.5), 8.03 (1H, d, *J*= 8.1), 8.13 (1H, d, *J*= 8.7), 9.76 (1H, s);

**<sup>13</sup>C NMR (75 MHz, DMSO-d<sub>6</sub>):** δ 26.0, 26.9, 28.9, 29.7, 31.9, 49.5, 111.9, 112.8, 116.7, 116.9, 119.6, 122.8, 123.4, 125.2, 129.0, 129.6, 131.3, 145.7, 151.6, 152.1, 154.5, 195.1;

**Anal. calcd for C<sub>21</sub>H<sub>22</sub>N<sub>2</sub>O:** C, 79.21; H, 6.96; N, 8.80 %. Found: C, 79.28; H, 6.87; N, 8.72 %.

**3,3-dimethyl-11-(4-nitrophenyl)-2,3,4,5,10,11-hexahydro-1*H*-dibenzo[*b,e*][1,4]diazepin-1-one(4b)**

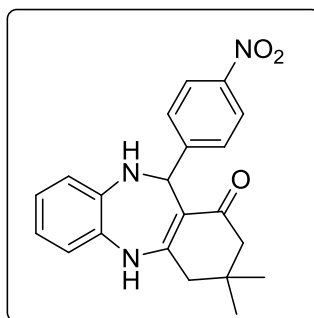

**Yield:** 97% (0.352 g)

**Characteristic:** Yellow solid

**Mp:** 277-279 °C

IR (KBr): 3290, 3231, 3042, 2950, 1682, 1276  $\text{cm}^{-1}$ ;

$^1\text{H}$  NMR (300 MHz,  $\text{DMSO-d}_6$ ):  $\delta$  1.03 (3H, s), 1.09 (3H, s), 2.50 (2H, s), 2.62 (2H, s), 5.79 (1H, d,  $J=5.7$ ), 6.37 (1H, d,  $J=5.7$ ), 6.51-6.54 (1H, m), 6.59-6.66 (2H, m), 6.96-6.99 (1H, m), 7.32 (2H, d,  $J=8.7$ ), 8.01 (2H, d,  $J=8.7$ ), 8.95 (1H, s);

$^{13}\text{C}$  NMR (75 MHz,  $\text{DMSO-d}_6$ ):  $\delta$  28.1, 28.7, 32.2, 44.5, 49.8, 56.4, 109.4, 120.5, 120.7, 120.9, 123.5, 128.8, 131.5, 138.3, 146.2, 153.3, 155.5, 192.7;

Anal. calcd for  $\text{C}_{21}\text{H}_{21}\text{N}_3\text{O}_3$ : C, 69.41; H, 5.82; N, 11.56 %. Found: C 63.89, H 3.56, N 17.21 %.

**3,3-dimethyl-11-(3-nitrophenyl)-2,3,4,5,10,11-hexahydro-1H-dibenzo[*b,e*][1,4]diazepin-1-one (4c)**

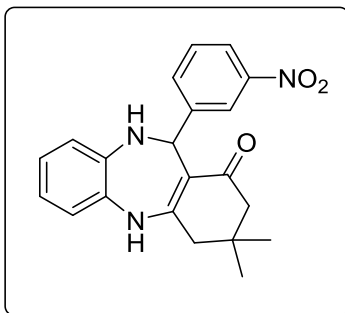

**Yield:** 95% (0.345 g)

**Characteristic:** Pale yellow solid

**Mp:** 160-162  $^{\circ}\text{C}$

IR (KBr): 3356, 3281, 3181, 2955, 1690, 1512, 1422, 1278  $\text{cm}^{-1}$ ;

$^1\text{H}$  NMR (300 MHz,  $\text{DMSO-d}_6$ ):  $\delta$  0.95 (3H, s), 1.03 (3H, s), 2.36 (2H, s), 2.48 (2H, s), 5.64 (1H, d,  $J=5.7$  Hz), 6.22 (1H, d,  $J=5.7$  Hz), 6.39 (1H, d,  $J=6.6$  Hz), 6.47-6.49 (2H, m), 6.83-6.85 (1H, m), 7.17-7.19 (2H, m), 7.85-7.88 (2H, m), 8.79 (1H, s);

$^{13}\text{C}$  NMR (75 MHz,  $\text{DMSO-d}_6$ ):  $\delta$  27.4, 28.2, 31.6, 44.4, 49.4, 56.4, 108.9, 120.2, 120.6, 122.1, 122.5, 122.9, 127.9, 130.8, 137.2, 145.5, 152.2, 155.0, 192.7;

HRMS calcd for  $\text{C}_{21}\text{H}_{21}\text{N}_3\text{O}_3$  ( $[\text{M}+\text{H}]^+$ ): 364.1656; found : 364.1750.

Anal. calcd for  $\text{C}_{21}\text{H}_{21}\text{N}_3\text{O}_3$ : C, 69.41; H, 5.82; N, 11.56 %. Found: C 63.89, H 3.56, N 17.21 %.

**11-(4-bromophenyl)-3,3-dimethyl-2,3,4,5,10,11-hexahydro-1H-dibenzo[*b,e*][1,4]diazepin-1-one (4d)**

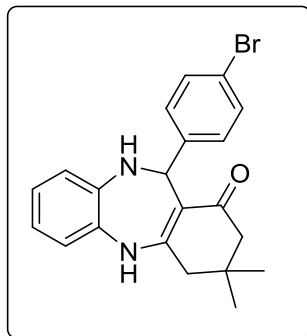

**Yield:** 88% (0.348 g)

**Characteristic:** Green solid

**Mp:** 290-292 °C

**IR (KBr):** 3352, 3272, 3185, 2951, 1692, 1270  $\text{cm}^{-1}$ ;

**$^1\text{H}$  NMR (300 MHz, DMSO- $d_6$ ):**  $\delta$  0.94 (3H, s), 1.00 (3H, s), 2.42 (2H, s), 2.53 (2H, s), 5.69 (1H, d,  $J= 5.4$  Hz), 6.28 (1H, d,  $J= 5.7$  Hz), 6.43-6.46 (1H, m), 6.53-6.55 (2H, s), 6.89-6.90 (1H, m), 7.24 (2H, d,  $J= 8.1$  Hz), 7.93 (2H, d,  $J= 7.8$  Hz), 8.86 (1H, s);

**$^{13}\text{C}$  NMR (75 MHz, DMSO- $d_6$ ):**  $\delta$  28.0, 28.6, 32.2, 44.5, 49.8, 56.3, 109.3, 120.5, 120.7, 120.9, 123.5, 128.8, 131.4, 138.8, 142.1, 146.1, 153.3, 155.5, 192.6;

**Anal. calcd for  $\text{C}_{21}\text{H}_{21}\text{BrN}_2\text{O}$ :** C, 63.48; H, 5.33; N, 7.05 %. **Found:** C, 63.62; H, 6.03; N, 7.25 %.

**11-(2-chlorophenyl)-3,3-dimethyl-2,3,4,5,10,11-hexahydro-1H-dibenzo[*b,e*][1,4]diazepin-1-one (4e)**

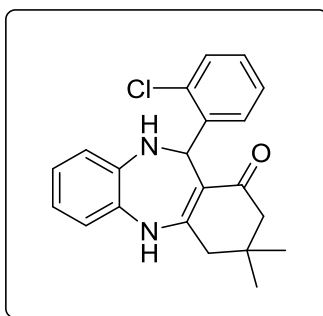

**Yield:** 91% (0.320 g)

**Characteristic:** White solid

**Mp:** 235-238 °C

**IR (KBr):** 3354, 3279, 3181, 2956, 1691, 1278  $\text{cm}^{-1}$ ;

$^1\text{H}$  NMR (300 MHz, DMSO- $d_6$ ):  $\delta$  0.94 (3H, s), 0.99 (3H, s), 2.42 (2H, s), 2.53 (2H, s), 5.69 (1H, d,  $J$ = 5.7 Hz), 6.28 (1H, d,  $J$ = 6.0 Hz), 6.42-6.46 (1H, m), 6.52-6.56 (2H, m), 6.87-6.90 (1H, m), 7.23 (2H, d,  $J$ = 8.7 Hz), 7.92 (2H, d,  $J$ = 8.7 Hz), 8.86 (1H, s);

$^{13}\text{C}$  NMR (75 MHz, DMSO- $d_6$ ):  $\delta$  28.1, 28.7, 32.2, 44.5, 49.5, 49.8, 109.4, 120.5, 120.7, 120.9, 123.5, 128.8, 131.4, 138.3, 146.2, 153.3, 155.5, 192.7;

Anal.calcd for  $\text{C}_{21}\text{H}_{21}\text{ClN}_2\text{O}$ : C, 71.48; H, 6.00; N, 7.94 %. Found: C, 72.02; H, 6.18; N, 7.99 %.

#### 4-(3,3-dimethyl-1-oxo-2,3,4,5,10,11-hexahydro-1H-dibenzo[*b,e*][1,4]diazepin-11-yl)benzonitrile (4f)

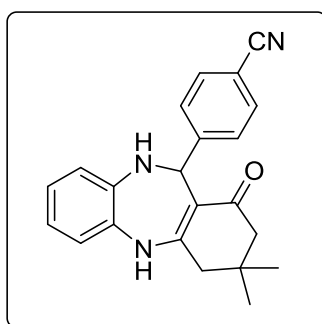

**Yield:** 85% (0.292 g)

**Characteristic:** Yellow solid

**Mp:** 225-227 °C

**IR (KBr):** 3385, 3291, 3078, 2953, 2221, 1687, 1585 $\text{cm}^{-1}$ ;

$^1\text{H}$  NMR (300 MHz, DMSO- $d_6$ ):  $\delta$  0.92 (3H, s), 0.98 (3H, s), 2.39 (2H, s), 2.51 (2H, s), 5.67 (1H, d,  $J$ = 5.7 Hz), 6.27 (1H, d,  $J$ = 5.7 Hz), 6.41-6.43 (1H, m), 6.49-6.55 (2H, m), 6.86-6.88 (1H, m), 7.21 (2H, d,  $J$ = 8.4 Hz), 7.90 (2H, d,  $J$ = 7.8 Hz), 8.84 (1H, s);

$^{13}\text{C}$  NMR (75 MHz, DMSO- $d_6$ ):  $\delta$  28.6, 32.2, 44.4, 49.8, 56.2, 109.3, 120.6, 120.7, 120.9, 123.5, 123.8, 131.5, 138.3, 142.1, 146.1, 153.2, 155.6, 192.3;

Anal.calcd for  $\text{C}_{22}\text{H}_{21}\text{N}_3\text{O}$ : C, 76.94; H, 6.16; N, 12.24 %. Found: C 77.04; H, 6.19; N, 12.29 %.

#### 3,3-dimethyl-11-(*p*-tolyl)-2,3,4,5,10,11-hexahydro-1H-dibenzo[*b,e*][1,4]diazepin-1-one (4g)



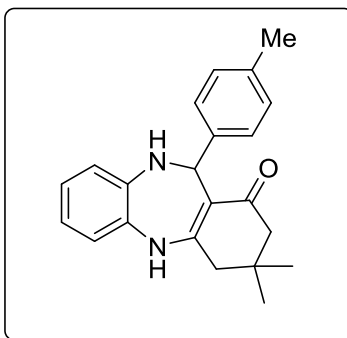

**Yield:** 86% (0.286 g)

**Characteristic:** Green solid

Mp: 220-222 °C

IR (KBr): 3311, 3040, 2962, 2359, 1995, 1680, 1584 $\text{cm}^{-1}$ ;

$^1\text{H}$  NMR (300 MHz,  $\text{DMSO-d}_6$ ):  $\delta$  1.04 (3H, s), 1.22 (3H, s), 2.39 (2H, s), 2.49 (2H, s), 2.78 (3H, s), 4.41 (1H, d,  $J=5.7$  Hz), 6.29 (1H, d,  $J=5.7$  Hz), 7.09 (1H, d,  $J=8.7$  Hz), 7.14-7.54 (5H, m), 8.10 (2H, d,  $J=8.7$  Hz), 9.13 (1H, s);

$^{13}\text{C}$  NMR (75 MHz,  $\text{DMSO-d}_6$ ):  $\delta$  20.4, 27.9, 28.3, 31.6, 44.4, 49.4, 56.3, 108.9, 120.2, 120.6, 122.2, 122.5, 122.9, 127.9, 130.9, 137.2, 145.6, 152.3, 155.0, 160.7, 193.6;

Anal. calcd for  $\text{C}_{22}\text{H}_{24}\text{N}_2\text{O}$ : C, 79.48; H, 7.28; N, 8.43 %. Found: C, 80.21; H, 7.30; N, 8.53 %.

**11-(4-methoxyphenyl)-3,3-dimethyl-2,3,4,5,10,11-hexahydro-1H-dibenzo[*b,e*][1,4]diazepin-1-one (4h)**

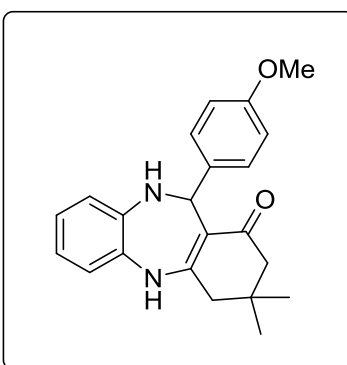

**Yield:** 88% (0.306 g)

**Characteristic:** Cream colored solid

Mp: 215-217 °C

IR (KBr): 3312, 2965, 2362, 1584, 1538  $\text{cm}^{-1}$ ;

$^1\text{H}$  NMR (300 MHz,  $\text{DMSO-d}_6$ ):  $\delta$  1.04 (3H, s), 1.21 (3H, s), 2.49 (2H, s), 2.51 (2H, s), 3.83 (3H, s), 4.40 (1H, d,  $J= 5.7$  Hz), 6.59 (1H, d,  $J= 5.7$  Hz), 7.08-7.54 (6H, m), 8.10 (2H, d,  $J= 8.7$  Hz), 9.14 (1H, s);

$^{13}\text{C}$  NMR (75 MHz,  $\text{DMSO-d}_6$ ):  $\delta$  27.5, 28.2, 31.7, 49.3, 56.3, 58.4, 108.5, 120.2, 120.6, 122.2, 122.6, 122.9, 127.9, 130.9, 137.2, 145.6, 152.3, 155.1, 192.3;

Anal.calcd for  $\text{C}_{22}\text{H}_{24}\text{N}_2\text{O}_2$ : C, 75.83; H, 6.94; N, 8.04% Found: C, 75.76; H, 6.90; N, 8.02%

**11-(4-hydroxyphenyl)-3,3-dimethyl-2,3,4,5,10,11-hexahydro-1H-dibenzo[*b,e*][1,4]diazepin-1-one (4i)**

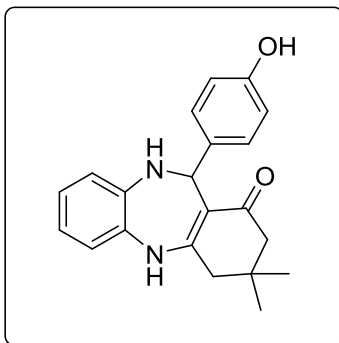

**Yield:** 83% (0.277 g)

**Characteristic:** Green solid

**Mp:** 270-272  $^{\circ}\text{C}$

IR (KBr): 3620, 3309, 3243, 3101, 1599, 1384, 1528, 1424, 1275  $\text{cm}^{-1}$ ;

$^1\text{H}$  NMR (300 MHz,  $\text{DMSO-d}_6$ ):  $\delta$  0.58 (3H, s), 0.65 (3H, s), 1.93 (2H, s), 2.13 (2H, s), 5.28 (1H, m), 5.44 (1H, s), 6.03-6.49 (4H, m), 6.81 (2H, d,  $J= 7.8$  Hz), 7.43 (2H, d,  $J= 7.5$  Hz), 8.23 (2H, s);

$^{13}\text{C}$  NMR (75 MHz,  $\text{DMSO-d}_6$ ):  $\delta$  28.2, 28.6, 31.2, 32.2, 49.8, 56.5, 109.3, 120.7, 120.9, 121.2, 123.5, 128.9, 131.1, 138.1, 146.3, 153.2, 155.7, 192.6;

Anal.calcd for  $\text{C}_{21}\text{H}_{22}\text{N}_2\text{O}_2$ : C, 75.42; H, 6.63; N, 8.38 % Found: C, 75.49; H, 6.68; N, 8.37%.

**11-(2,3-dichlorophenyl)-3,3-dimethyl-2,3,4,5,10,11-hexahydro-1H-dibenzo[*b,e*][1,4]diazepin-1-one (4j)**

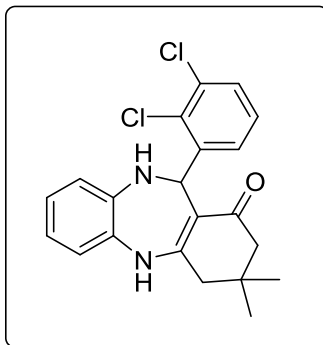

**Yield:** 90% (0.347 g)

**Characteristic:** Green solid

Mp: 256-258 °C

IR (KBr): 3325, 3256, 2961, 2343, 1576  $\text{cm}^{-1}$ ;

$^1\text{H}$  NMR (300 MHz,  $\text{DMSO-d}_6$ ):  $\delta$  1.02 (3H, s), 1.08 (3H, s), 2.49 (2H, s), 2.62 (2H, s), 5.77 (1H, d,  $J= 6.9$ ), 6.55 (1H, d,  $J= 7.5$ ), 6.62-6.64 (2H, m), 6.98-7.00 (1H, m), 7.32 (2H, d,  $J= 8.1$ ), 8.00 (2H, d,  $J= 8.7$ ), 8.44 (1H, s);

$^{13}\text{C}$  NMR (75 MHz,  $\text{DMSO-d}_6$ ):  $\delta$  28.1, 28.7, 31.1, 32.3, 44.5, 49.8, 56.4, 109.4, 120.7, 120.8, 121.1, 123.5, 128.8, 131.5, 138.1, 146.2, 153.2, 155.6, 192.7;

Anal. calcd for  $\text{C}_{21}\text{H}_{20}\text{Cl}_2\text{N}_2\text{O}$ : C, 65.12; H, 5.21; N, 7.23 %. Found: C, 65.23; H, 5.26; N, 7.29 %.

#### 11-isopropyl-3,3-dimethyl-2,3,4,5,10,11-hexahydro-1H-dibenzo[*b,e*][1,4]diazepin-1-one (4k)

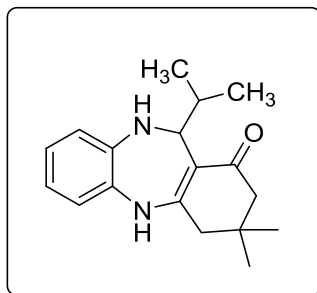

**Yield:** 82% (0.233 g)

**Characteristic:** White solid

Mp: 202-205 °C

IR (KBr): 3311, 3237, 2959, 1599, 1425, 1278  $\text{cm}^{-1}$ ;

$^1\text{H}$  NMR (300 MHz, DMSO- $d_6$ ):  $\delta$  0.63 (3H, d,  $J$ = 6.6 Hz), 0.74 (3H, d,  $J$ = 6.6 Hz), 0.92 (3H, s), 0.96 (3H, s), 1.99-2.07 (1H, m), 2.37 (2H, s), 2.39 (2H, s), 4.04 (1H, d,  $J$ = 3.9 Hz), 5.69 (1H, d,  $J$ = 5.7 Hz) 6.55-6.58 (1H, m), 6.64-6.66 (1H, m), 6.88 (2H, d,  $J$ = 8.1 Hz), 8.46 (1H, s);

$^{13}\text{C}$  NMR (75 MHz, DMSO- $d_6$ ):  $\delta$  20.3, 20.8, 27.4, 29.5, 31.8, 33.4, 44.5, 49.9, 56.9, 113.5, 119.2, 120.0, 120.2, 122.8, 131.0, 138.6, 154.1, 192.5;

Anal.calcd for  $\text{C}_{18}\text{H}_{24}\text{N}_2\text{O}$ : C, 76.02; H, 8.51; N, 9.85 %. Found: C, 76.13; H, 8.71; N, 10.05 %.

**11-(furan-2-yl)-3,3-dimethyl-2,3,4,5,10,11-hexahydro-1H-dibenzo[*b,e*][1,4]diazepin-1-one(4l)**

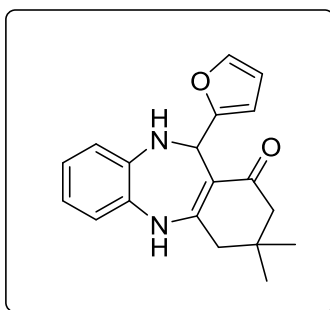

**Yield:** 80% (0.246 g)

**Characteristic:** Pale yellow solid

**Mp:** 216-218 °C

**IR** (KBr): 3303, 3245, 2949, 1581, 1537  $\text{cm}^{-1}$ ;

$^1\text{H}$  NMR (300 MHz, DMSO- $d_6$ ):  $\delta$  0.59 (3H, s), 0.65 (3H, s), 1.93 (2H, s), 2.13 (2H, s), 4.45 (1H, d,  $J$ = 5.7 Hz), 6.59 (1H, d,  $J$ = 5.7 Hz), 7.21-7.84 (7H, m), 9.25 (1H, s);

$^{13}\text{C}$  NMR (75 MHz, DMSO- $d_6$ ):  $\delta$  27.4, 32.6, 44.4, 49.8, 56.2, 109.4, 120.6, 120.7, 120.9, 123.4, 128.7, 131.3, 138.3, 142.1, 146.2, 193.6;

Anal.calcd for  $\text{C}_{19}\text{H}_{20}\text{N}_2\text{O}_2$ : C, 74.00; H, 6.54; N, 9.08 %. Found: C, 74.21; H, 6.66; N, 9.24 %.

**3,3-dimethyl-11-(thiophen-2-yl)-2,3,4,5,10,11-hexahydro-1H-dibenzo[*b,e*][1,4]diazepin-1-one (4m)**

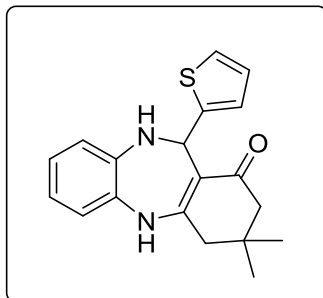

**Yield:** 82% (0.266 g)

**Characteristic:** Pale yellow solid

**Mp:** 225-227 °C

**IR (KBr):** 3312, 3242, 2946, 1584, 1535 $\text{cm}^{-1}$ ;

**$^1\text{H}$  NMR (300 MHz, DMSO- $d_6$ ):**  $\delta$  0.79 (3H, s), 0.86 (3H, s), 1.92 (2H, s), 2.10 (2H, s), 4.95 (1H, d,  $J= 5.7$  Hz), 6.59 (1H, d,  $J= 5.7$  Hz), 7.13-7.47 (5H, m), 7.64 (1H, d,  $J= 6.9$  Hz), 7.75 (1H, d,  $J= 7.1$  Hz), 9.16 (1H, s);

**$^{13}\text{C}$  NMR (75 MHz, DMSO- $d_6$ ):**  $\delta$  27.6, 32.2, 44.5, 49.7, 56.3, 109.3, 120.6, 120.7, 120.8, 123.4, 128.7, 131.4, 138.2, 142.1, 146.2, 193.4;

**Anal.** calcd for  $\text{C}_{19}\text{H}_{20}\text{N}_2\text{OS}$ : C, 70.34; H, 6.21; N, 8.63 %. Found: C 71.02; H, 6.31; N, 8.72 %.

**11-(1H-indol-3-yl)-3,3-dimethyl-2,3,4,5,10,11-hexahydro-1H-dibenzo[*b,e*][1,4]diazepin-1-one (4n)**

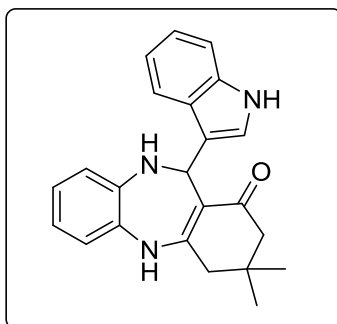

**Yield:** 83% (0.296 g)

**Characteristic:** Yellow solid

**Mp:** 287-289 °C

**IR (KBr):** 3315, 3240, 3115, 1592, 1270  $\text{cm}^{-1}$ ;

$^1\text{H}$  NMR (300 MHz, DMSO- $d_6$ ):  $\delta$  0.97 (3H, s), 1.02 (3H, s), 2.49 (2H, s), 2.62 (2H, s), 5.79 (1H, s), 6.55 (1H, s), 6.62-6.64 (2H, m), 6.97-6.99 (2H, m), 7.32 (2H, d,  $J=8.4$ ), 7.99 (2H, d,  $J=7.5$ ), 8.44 (1H, s), 9.97 (2H, s);

$^{13}\text{C}$  NMR (75 MHz, DMSO- $d_6$ ):  $\delta$  31.1, 32.3, 44.5, 49.8, 56.4, 109.3, 120.7, 120.8, 121.1, 123.5, 124.8, 128.8, 131.5, 138.1, 146.2, 153.2, 155.2, 192.7;

Anal.calcd for  $\text{C}_{23}\text{H}_{23}\text{N}_3\text{O}$ : C, 77.28; H, 6.49; N, 11.76 %. Found: C, 77.34; H, 6.55; N, 11.77%

**3,3-dimethyl-11-(quinolin-2-yl)-2,3,4,5,10,11-hexahydro-1H-dibenzo[*b,e*][1,4]diazepin-1-one (4o)**

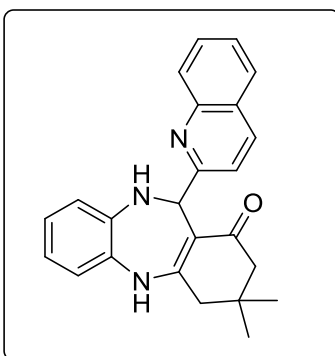

**Yield:** 87% (0.321 g)

**Characteristic:** Yellow solid

**Mp:** 290-292°C

**IR (KBr):** 3318, 3247, 1473, 1582, 1271  $\text{cm}^{-1}$ ;

$^1\text{H}$  NMR (300 MHz, DMSO- $d_6$ ):  $\delta$  1.12 (3H, s), 1.17 (3H, s), 2.58 (2H, s), 2.70 (2H, s), 5.87 (1H, s), 6.63 (1H, s), 6.71-6.73 (2H, m), 7.05-7.08 (3H, m), 7.40 (3H, d,  $J=8.7$ ), 8.08 (2H, d,  $J=8.4$ ), 8.52 (1H, s);

$^{13}\text{C}$  NMR (75 MHz, DMSO- $d_6$ ):  $\delta$  28.1, 28.7, 31.1, 40.5, 49.8, 56.4, 109.3, 113.3, 120.7, 120.8, 121.1, 123.5, 128.8, 131.5, 138.1, 142.3, 146.2, 148.7, 153.2, 155.7, 158.7, 192.7;

Anal.calcd for  $\text{C}_{24}\text{H}_{23}\text{N}_3\text{O}$ : C, 78.02; H, 6.27; N, 11.37%. Found: C, 78.13; H, 6.33; N, 11.42%.

**3,3,11-trimethyl-11-phenyl-2,3,4,5,10,11-hexahydro-1H-dibenzo[*b,e*][1,4]diazepin-1-one(4p)**

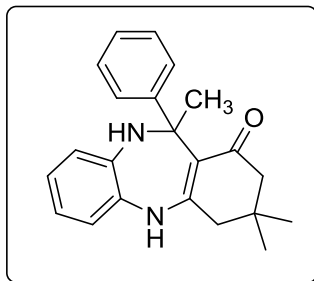

**Yield:** 80% (0.266 g)

**Characteristic:** Yellow solid

Mp: 252-254 °C

IR (KBr): 3292, 3231, 3051, 2952, 1594, 1269  $\text{cm}^{-1}$ ;

$^1\text{H}$  NMR (300 MHz,  $\text{DMSO-d}_6$ ):  $\delta$  0.98 (3H, s), 1.03 (3H, s), 1.78 (3H, s), 2.49 (2H, s), 2.65 (2H, s), 5.63 (1H, s), 7.28 (2H, t,  $J= 7.7$ ), 7.49 (2H, d,  $J= 8.4$ ), 7.62 (1H, t,  $J= 6.9$ ), 8.04-8.13 (4H, m), 8.49 (1H, s);

$^{13}\text{C}$  NMR (75 MHz,  $\text{DMSO-d}_6$ ):  $\delta$  31.2, 32.2, 44.6, 49.8, 56.5, 109.4, 120.6, 120.8, 121.1, 123.4, 124.8, 128.9, 131.6, 138.0, 146.3, 153.1, 155.3, 192.2;

Anal. calcd for  $\text{C}_{22}\text{H}_{24}\text{N}_2\text{O}$ : C, 79.48; H, 7.28; N, 8.43 %. Found: C, 80.02; H, 7.32; N, 8.55%.

**11-(4-nitrophenyl)-2,3,4,5,10,11-hexahydro-1H-dibenzo[*b,e*][1,4]diazepin-1-one (4q)**

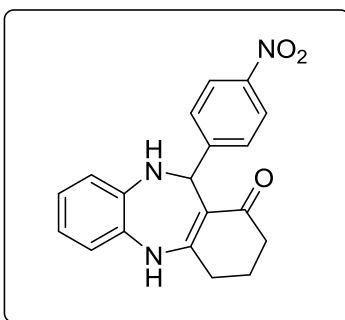

**Yield:** 84% (0.281 g)

**Characteristic:** Yellow solid

Mp: 255-257 °C

IR (KBr): 3290, 3234, 1682, 1592  $\text{cm}^{-1}$ ;

$^1\text{H}$  NMR (300 MHz, DMSO- $d_6$ ):  $\delta$  1.35-1.41 (2H, m), 2.36 (2H, t,  $J= 4.5$ ), 2.80 (2H, t,  $J= 4.5$ ), 5.23 (1H, s), 6.25 (1H, s), 6.59 (1H, d,  $J= 6.9$ ), 6.68-6.76 (2H, m), 7.01 (1H, d,  $J= 7.5$ ), 7.34 (2H, d,  $J= 8.7$ ), 8.04 (2H, d,  $J= 8.7$ ), 10.51 (1H, s);

$^{13}\text{C}$  NMR (75 MHz, DMSO- $d_6$ ): 21.5, 27.1, 33.4, 56.6, 113.5, 120.5, 121.2, 122.7, 123.6, 128.7, 131.8, 137.8, 146.5, 152.5, 167.7, 172.4, 199.8;

Anal.calcd for  $\text{C}_{19}\text{H}_{17}\text{N}_3\text{O}_3$ : C, 68.05; H, 5.11; N, 12.53 %. Found: C, 68.11; H, 5.19; N, 12.72 %.

### 10-(4-nitrophenyl)-3,4,9,10-tetrahydrobenzo[*b*]cyclopenta[*e*][1,4]diazepin-1(2*H*)-one(4r)

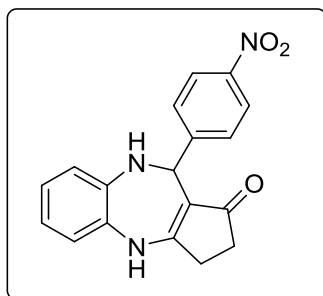

**Yield:** 96% (0.308 g)

**Characteristic:** Bright yellow solid

Mp: 223-224 °C

IR (KBr): 3292, 3231, 1613, 1432, 1245  $\text{cm}^{-1}$ ;

$^1\text{H}$  NMR (300 MHz, DMSO- $d_6$ ):  $\delta$  2.36 (2H, t,  $J= 4.5$ ), 2.80 (2H, t,  $J= 4.5$ ), 5.23 (1H, s), 6.24 (1H, s), 6.59 (1H, d,  $J= 6.9$ ), 6.70-6.75 (2H, m), 7.00 (1H, d,  $J= 7.5$ ), 7.33 (2H, d,  $J= 8.7$ ), 8.03 (2H, d,  $J= 8.7$ ), 9.89 (1H, s);

$^{13}\text{C}$  NMR (75 MHz, DMSO- $d_6$ ):  $\delta$  27.1, 33.4, 56.6, 113.5, 120.5, 121.2, 122.7, 123.6, 128.7, 131.8, 137.8, 146.5, 152.5, 167.7, 172.4, 199.8.

Anal.calcd for  $\text{C}_{18}\text{H}_{15}\text{N}_3\text{O}_3$ : C, 67.28; H, 4.71; N, 13.08 %. Found: C, 67.55; H, 4.91; N, 13.77 %.

### 7-(4-nitrophenyl)-8,13-dihydrobenzo[*b*]chromeno[4,3-*e*][1,4]diazepin-6(7*H*)-one (4s)



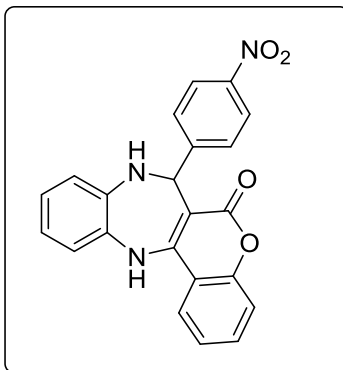

**Yield:** 95% (0.366 g)

**Characteristic:** Light yellow solid

**Mp:** 280-282°C

**IR (KBr):** 3385, 3292, 1755, 1666  $\text{cm}^{-1}$ ;

**$^1\text{H}$  NMR (300 MHz, DMSO- $d_6$ ):**  $\delta$  6.29 (1H, s), 7.28 (2H, t,  $J=7.5$ ), 7.48-7.64 (6H, m), 8.04-8.13 (4H, m), 8.43 (1H, s), 10.84 (1H, s);

**$^{13}\text{C}$  NMR (75 MHz, DMSO- $d_6$ ):**  $\delta$  55.7, 106.2, 114.1, 114.6, 114.9, 117.2, 119.9, 120.5, 122.1, 123.4, 124.6, 128.4, 128.9, 129.3, 131.3, 134.1, 147.5, 151.8, 157.2, 159.3;

**Anal. calcd for  $\text{C}_{22}\text{H}_{15}\text{N}_3\text{O}_4$ :** C, 68.57; H, 3.92; N, 10.90 %. Found: C, 68.76; H, 4.02; N, 11.03 %.

**5-methyl-7-(4-nitrophenyl)-5,7,8,13-tetrahydro-6H-benzo[2,3][1,4]diazepino[6,5-c]quinolin-6-one (4t)**

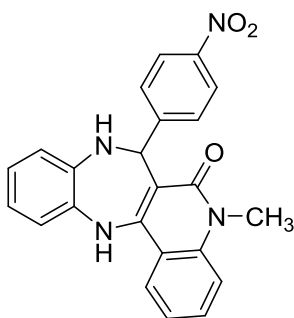

**Yield:** 96% (0.382 g)

**Characteristic:** Yellow solid

**Mp:** >300 °C

**IR (KBr):** 3385, 3201, 2945, 1675  $\text{cm}^{-1}$ ;

$^1\text{H}$  NMR (300 MHz, DMSO- $d_6$ ):  $\delta$  4.10 (3H, s), 6.29 (1H, s), 7.28 (2H, t,  $J=7.5$  Hz), 7.49 (5H, d,  $J=8.4$  Hz), 7.62 (1H, t,  $J=7.1$  Hz), 8.04-8.13 (4H, m), 8.42 (1H, s), 10.73 (1H, s);

$^{13}\text{C}$  NMR (75 MHz, DMSO- $d_6$ ):  $\delta$  30.1, 53.9, 109.7, 114.9, 116.5, 121.8, 123.7, 127.9, 129.7, 129.9, 131.3, 139.1, 146.2, 149.8, 157.5, 163.0, 167.1;

HRMS calcd for  $\text{C}_{23}\text{H}_{18}\text{N}_4\text{O}_3$  ( $[\text{M}+\text{H}]^+$ ): 399.1452; found : 399.1455.

Anal.calcd for  $\text{C}_{23}\text{H}_{18}\text{N}_4\text{O}_3$ : C, 69.34; H, 4.55; N, 14.06 %. Found: C, 69.42; H, 4.62; N, 14.18 %.

### 11-ethyl-3,3,11-trimethyl-2,3,4,5,10,11-hexahydro-1*H*-dibenzo[*b,e*][1,4]diazepin-1-one (4u)

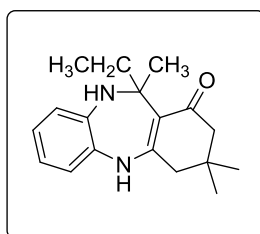

**Yield:** 86% (0.244 g)

**Characteristic:** White solid

Mp: 200-202 °C

IR (KBr): 3381, 3205, 2941, 1678  $\text{cm}^{-1}$ ;

$^1\text{H}$  NMR (300 MHz,  $\text{CDCl}_3$ ):  $\delta$  0.89 (6H, s), 0.97 (3H, t,  $J=6.5$ ), 1.42 (3H, s), 1.69-1.77 (2H, m), 2.14 (2H, s), 2.37 (2H, s), 6.37 (1H, s), 6.54 (1H, d,  $J=8.1^\circ$ ), 6.73 (1H, t,  $J=7.5$ ), 7.23-7.33 (2H, m), 7.57 (1H, s);

$^{13}\text{C}$  NMR (75 MHz,  $\text{CDCl}_3$ ):  $\delta$  8.1, 27.5, 34.8, 38.7, 44.2, 51.1, 114.4, 118.5, 128.3, 133.9, 160.6, 196.9;

Anal.calcd for  $\text{C}_{18}\text{H}_{24}\text{N}_2\text{O}$ : C, 76.02; H, 8.51; N, 9.85 %. Found: C, 77.00; H, 9.01; N, 10.08 %.

### 3,3,11-trimethyl-11-(2-oxo-2*H*-chromen-3-yl)-2,3,4,5,10,11-hexahydro-1*H*-dibenzo[*b,e*][1,4]diazepin-1-one (4v)

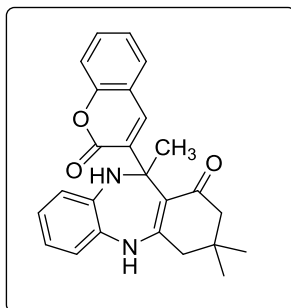

**Yield:** 81% (0.324 g)

**Characteristic:** Yellow solid

**Mp:** >300 °C

**IR (KBr):** 3345, 3215, 2942, 1745, 1668, 1596  $\text{cm}^{-1}$ ;

**$^1\text{H}$  NMR (300 MHz, DMSO- $d_6$ ):**  $\delta$  1.19 (6H, s), 1.59 (3H, s), 2.90 (2H, s), 2.98 (2H, s), 6.79 (1H, t,  $J=7.2$ ), 6.80-7.09 (3H, m), 7.21-7.35 (3H, m), 7.50 (1H, t,  $J=7.9$ ), 7.99 (1H, s), 9.91 (1H, s), 11.55 (1H, s);

**$^{13}\text{C}$  NMR (75 MHz, DMSO- $d_6$ ):**  $\delta$  831.1, 32.3, 44.9, 49.8, 56.6, 109.6, 120.7, 120.8, 121.4, 123.4, 124.3, 128.3, 131.8, 138.0, 146.1, 153.0, 155.3, 192.2;

**Anal. calcd for  $\text{C}_{25}\text{H}_{24}\text{N}_2\text{O}_3$ :** C, 74.98; H, 6.04; N, 7.00%. Found: C, 75.15; H, 6.27; N, 7.18 %.

**11-benzoyl-3,3-dimethyl-2,3,4,5,10,11-hexahydro-1H-dibenzo[b,e][1,4]diazepin-1-one (4w)**

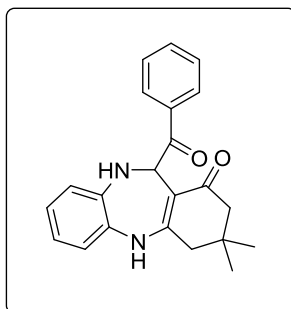

**Yield:** 80% (0.277 g)

**Characteristic:** Yellow solid

**Mp:** 287-287 °C

**IR (KBr):** 3340, 3212, 2954, 1742, 1668, 1689, 1596  $\text{cm}^{-1}$ ;

$^1\text{H}$  NMR (300 MHz, DMSO- $d_6$ ):  $\delta$  0.94 (3H, s), 1.03 (3H, s), 2.36 (2H, s), 2.48 (2H, s), 6.54 (1H, d,  $J=6.9$ ), 7.16 (1H, d,  $J=7.2$ ), 7.40-7.47 (6H, m), 7.73-7.78 (2H, m), 8.29 (1H, d,  $J=8.1$ ), 9.23 (1H, s);

$^{13}\text{C}$  NMR (75 MHz, DMSO- $d_6$ ):  $\delta$  26.5, 26.9, 28.9, 29.7, 31.9, 40.6, 111.9, 112.1, 116.8, 116.9, 119.6, 122.8, 123.4, 125.2, 129.0, 129.7, 131.3, 151.6, 152.1, 180.9, 195.2;

Anal. calcd for  $\text{C}_{22}\text{H}_{22}\text{N}_2\text{O}_2$ : C, 76.28; H, 6.40; N, 8.09%. Found: C, 76.32; H, 6.48; N, 8.16 %.

**11-(4-acetylphenyl)-3,3-dimethyl-2,3,4,5,10,11-hexahydro-1H-dibenzo[*b,e*][1,4]diazepin-1-one (4x)**

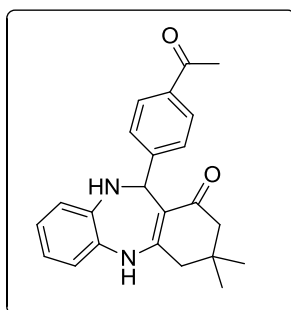

**Yield:** 90% (0.325 g)

**Characteristic:** White solid

**Mp:** 270-272 °C

**IR (KBr):** 3369, 3134, 2918, 1715, 1691, 1512  $\text{cm}^{-1}$ ;

$^1\text{H}$  NMR (300 MHz, DMSO- $d_6$ ):  $\delta$  1.04 (3H, s), 1.21 (3H, s), 2.38 (2H, s), 2.49 (2H, s), 2.79 (3H, s), 4.41 (1H, d,  $J=6.3$ ), 6.29 (1H, d,  $J=6.0$ ), 7.09-7.54 (6H, m), 8.10 (2H, d,  $J=9.0$ ), 9.12 (1H, s);

$^{13}\text{C}$  NMR (75 MHz, DMSO- $d_6$ ):  $\delta$  27.4, 28.3, 31.7, 44.5, 49.3, 56.4, 58.4, 108.5, 120.2, 120.6, 122.2, 122.9, 127.9, 130.9, 137.2, 152.3, 155.1, 188.3, 192.3;

Anal. calcd for  $\text{C}_{23}\text{H}_{24}\text{N}_2\text{O}_2$ : C, 76.64; H, 6.71; N, 7.77 %. Found: C, 76.89; H, 6.69; N, 7.99 %.

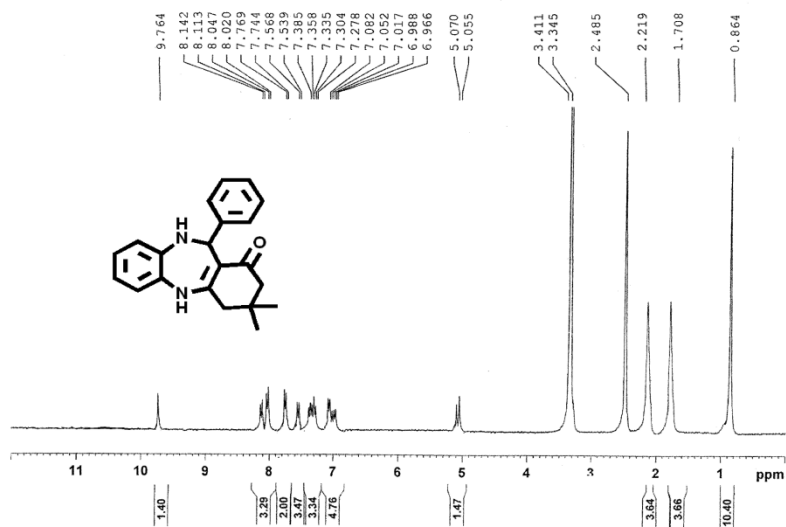

$^1\text{H}$  NMR spectra of compound **4a**

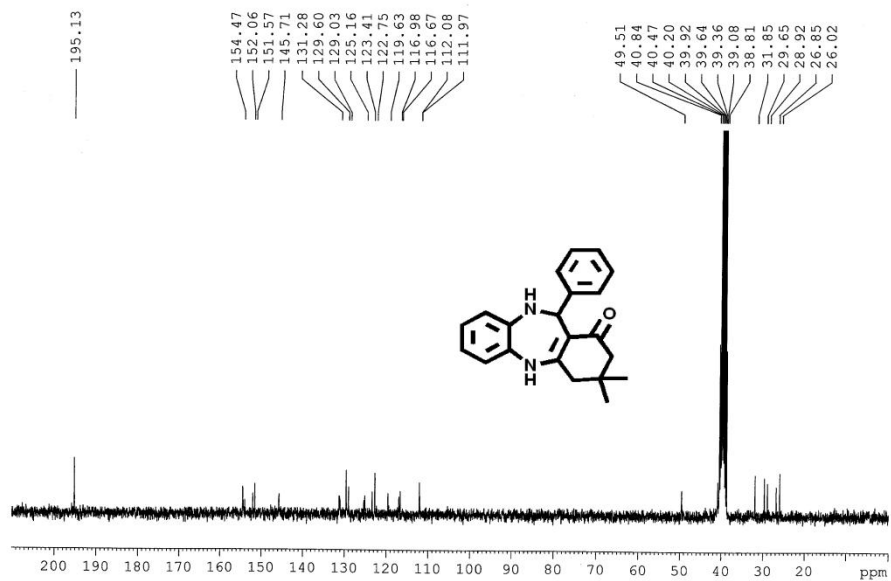

$^{13}\text{C}$  NMR spectra of compound **4a**

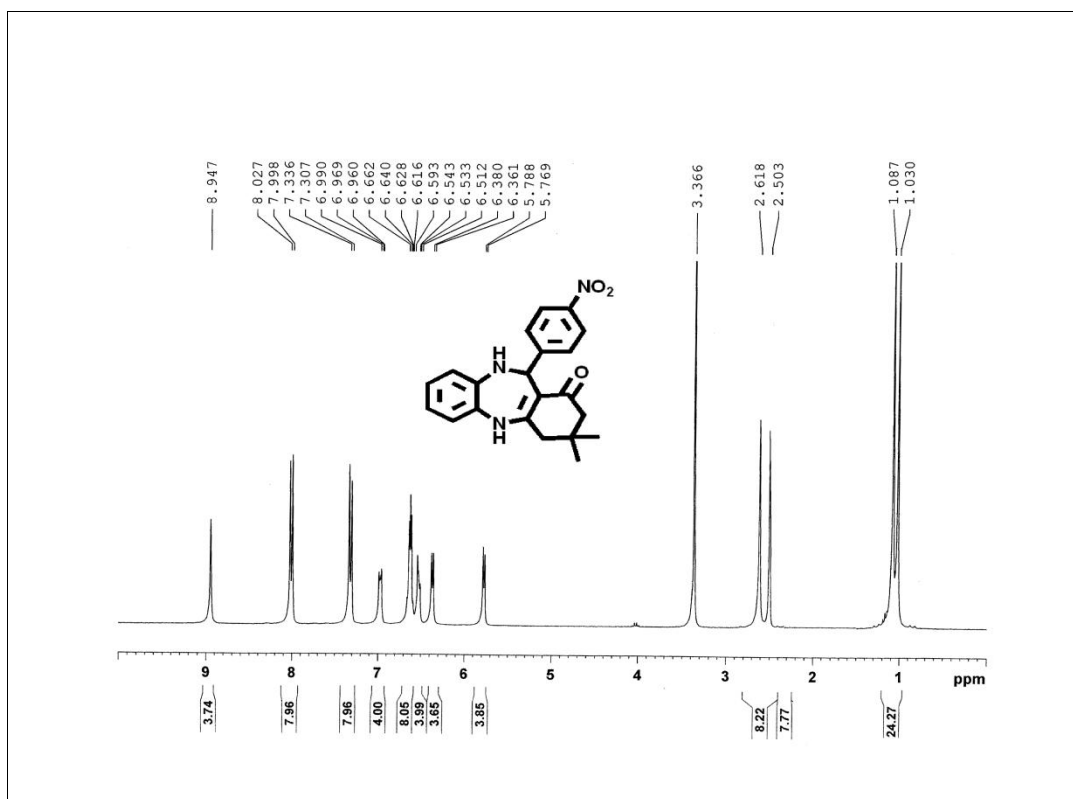

<sup>1</sup>H NMR spectra of compound **4b**

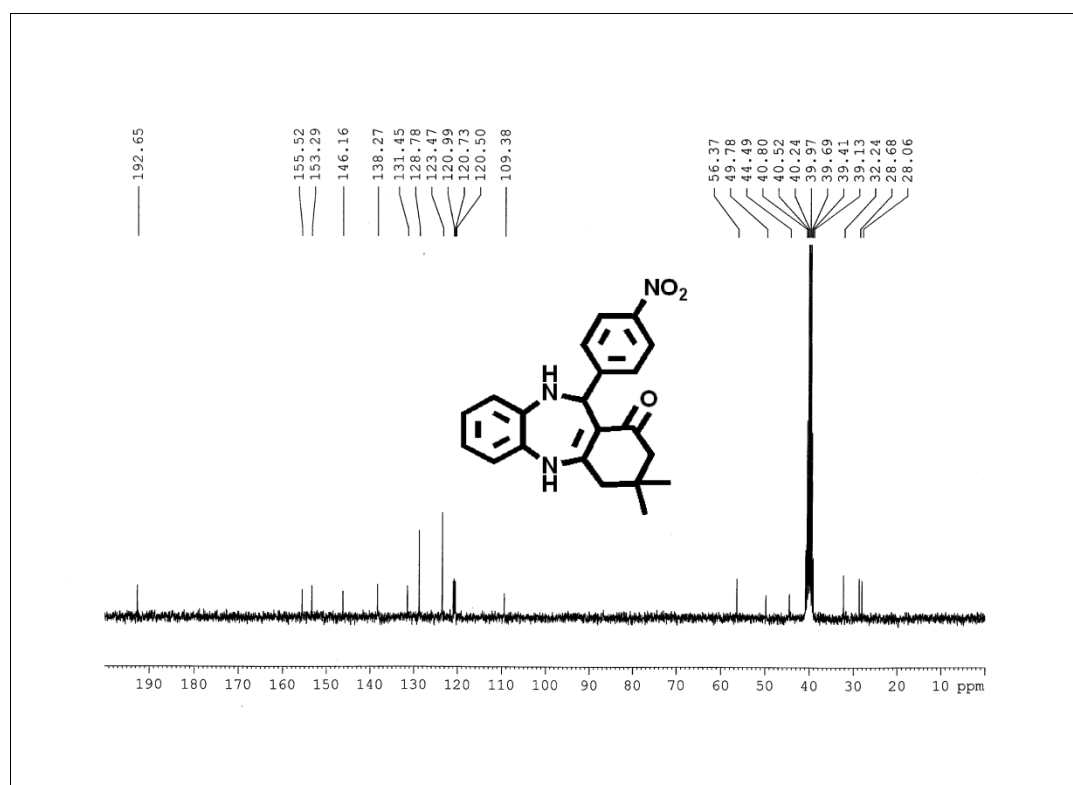

<sup>13</sup>C NMR spectra of compound **4b**

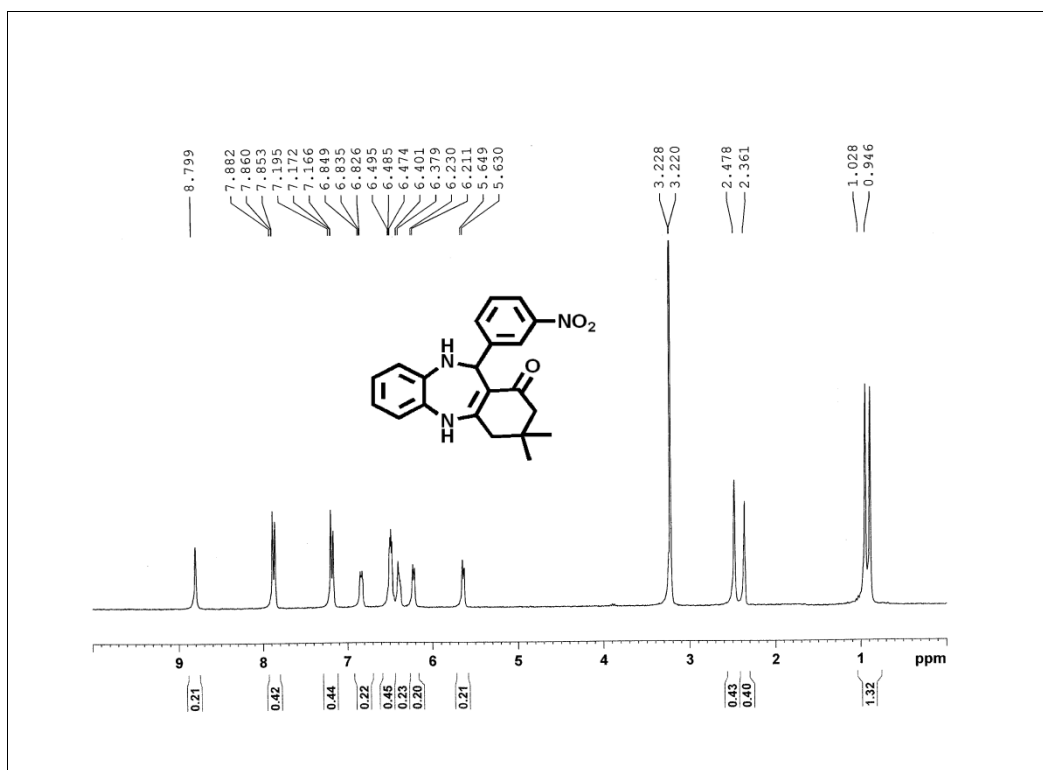

<sup>1</sup>H NMR spectra of compound 4c

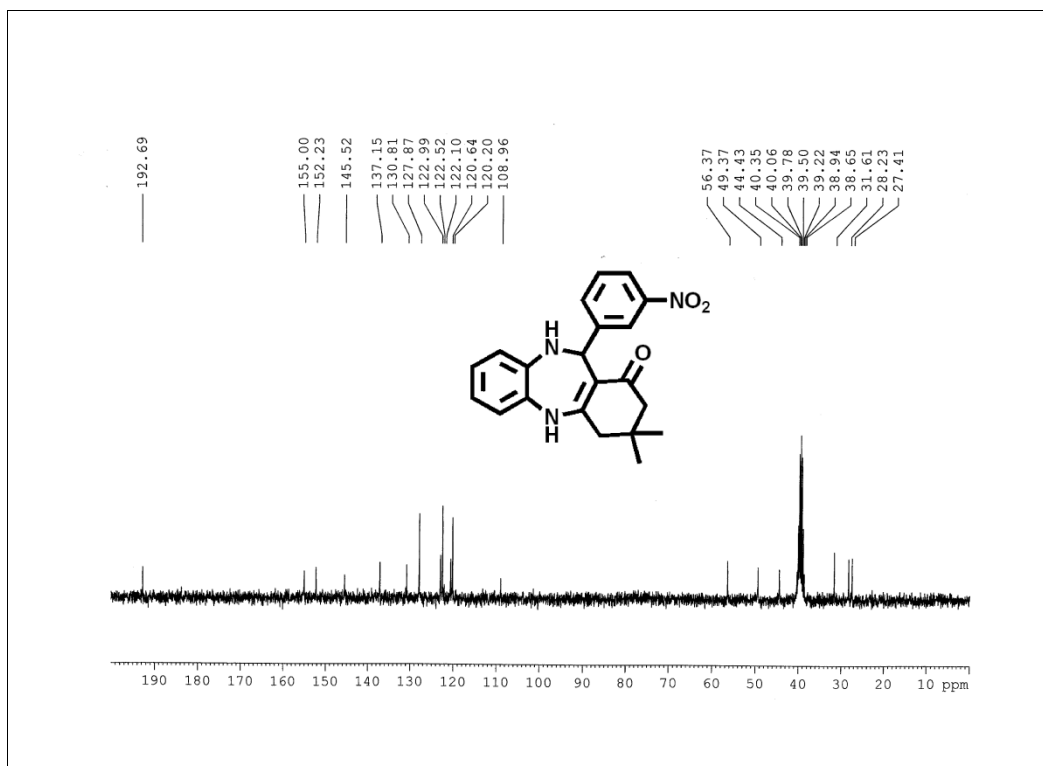

<sup>13</sup>C NMR spectra of compound 4c

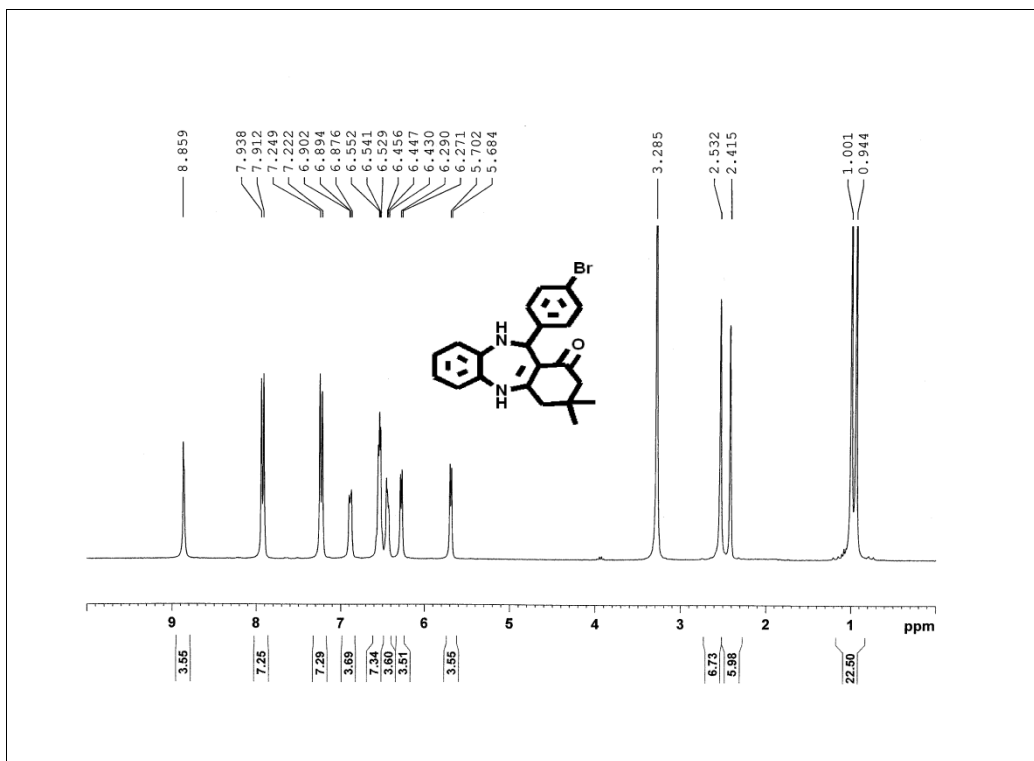

<sup>1</sup>H NMR spectra of compound 4d

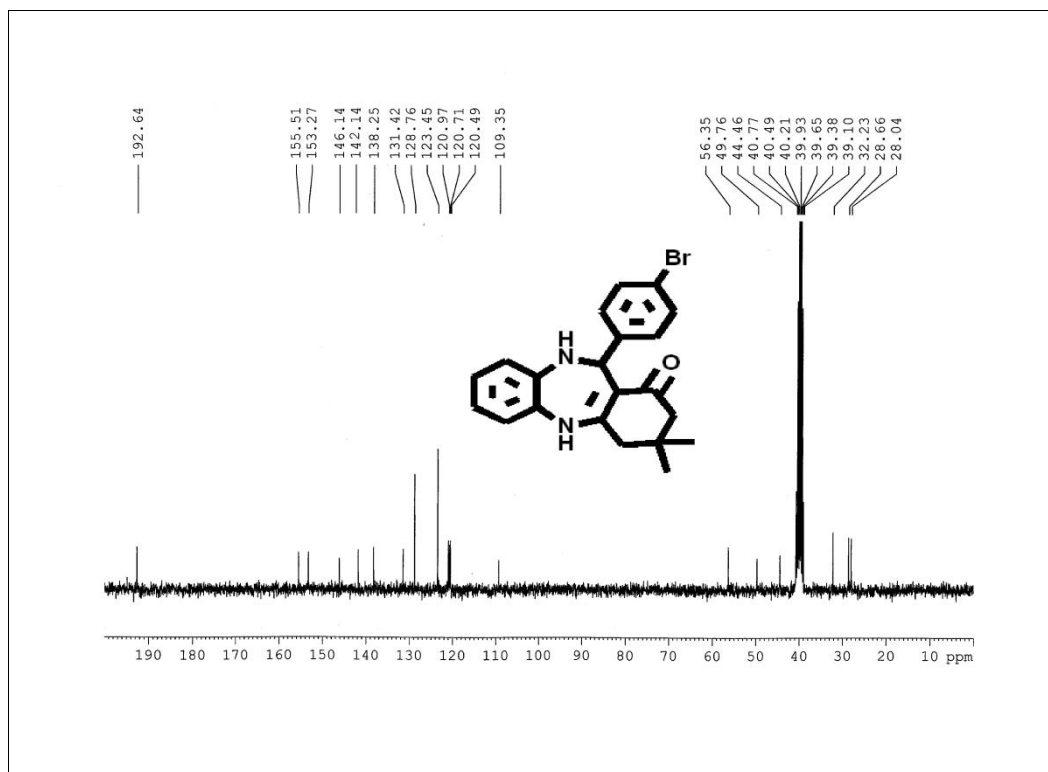

<sup>13</sup>C NMR spectra of compound 4d



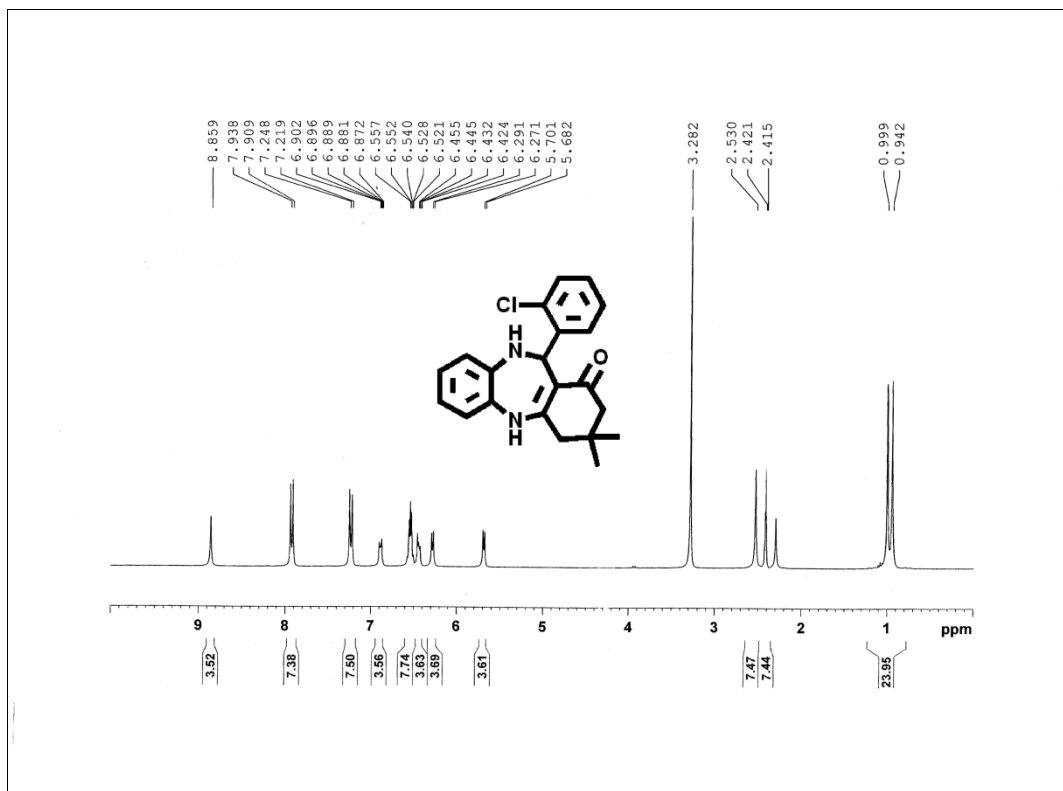

<sup>1</sup>H NMR spectra of compound 4e

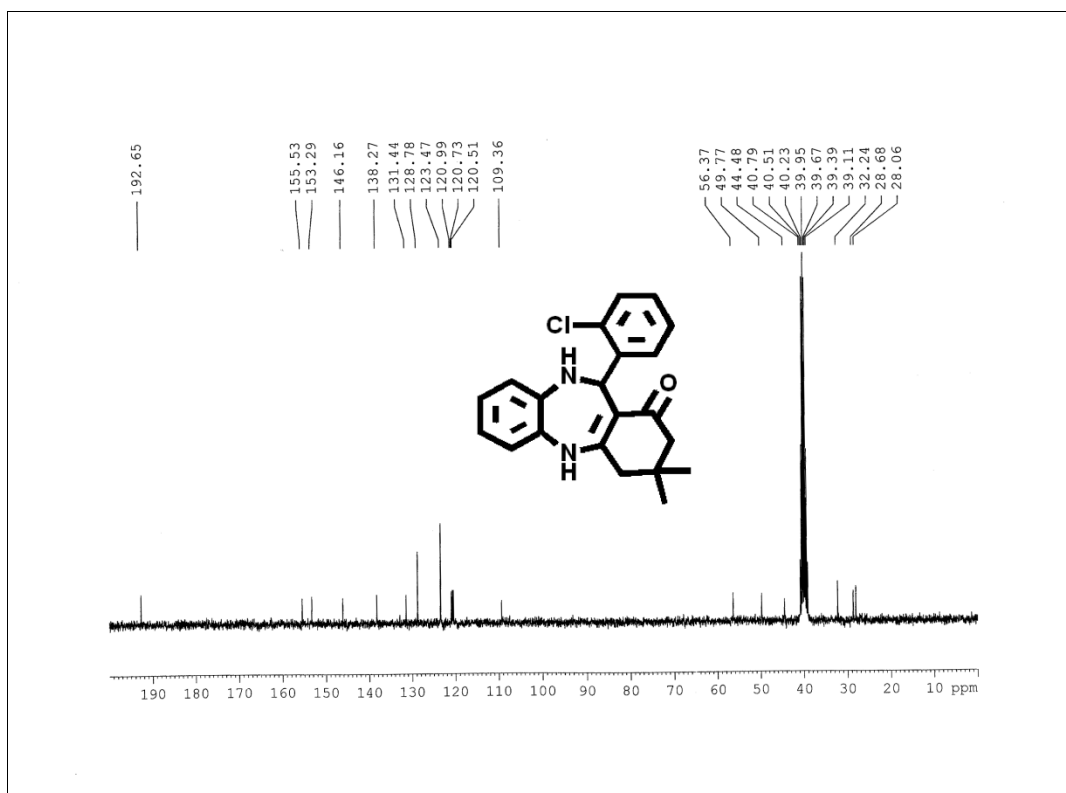

<sup>13</sup>C NMR spectra of compound 4e

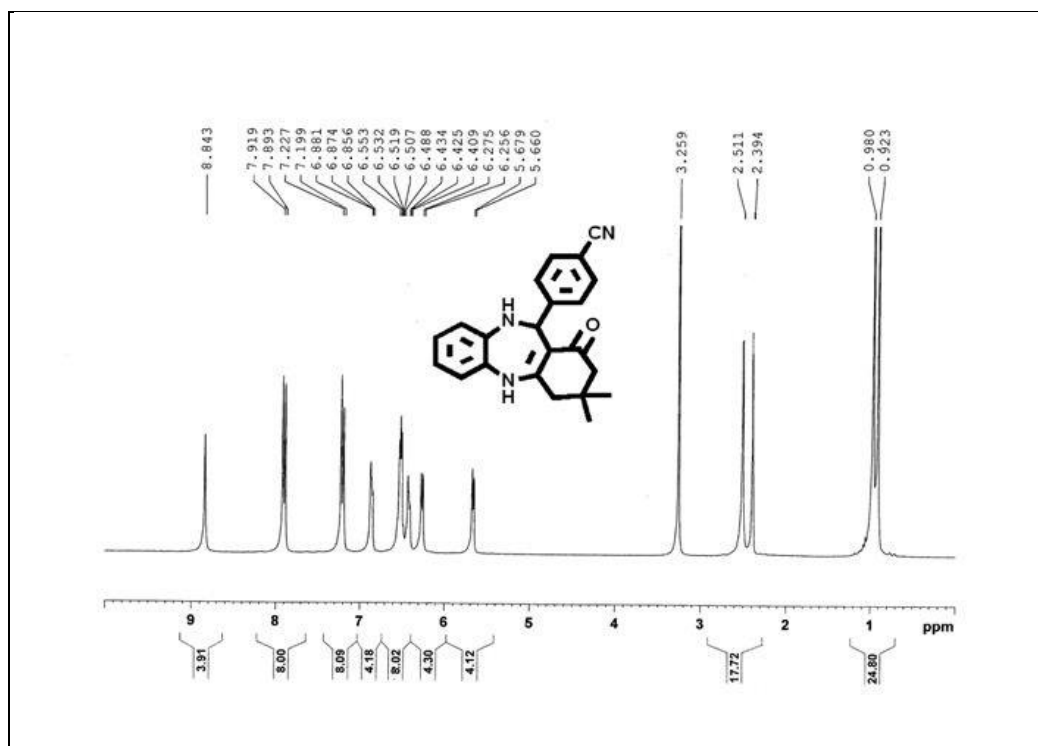

<sup>1</sup>H NMR spectra of compound **4f**

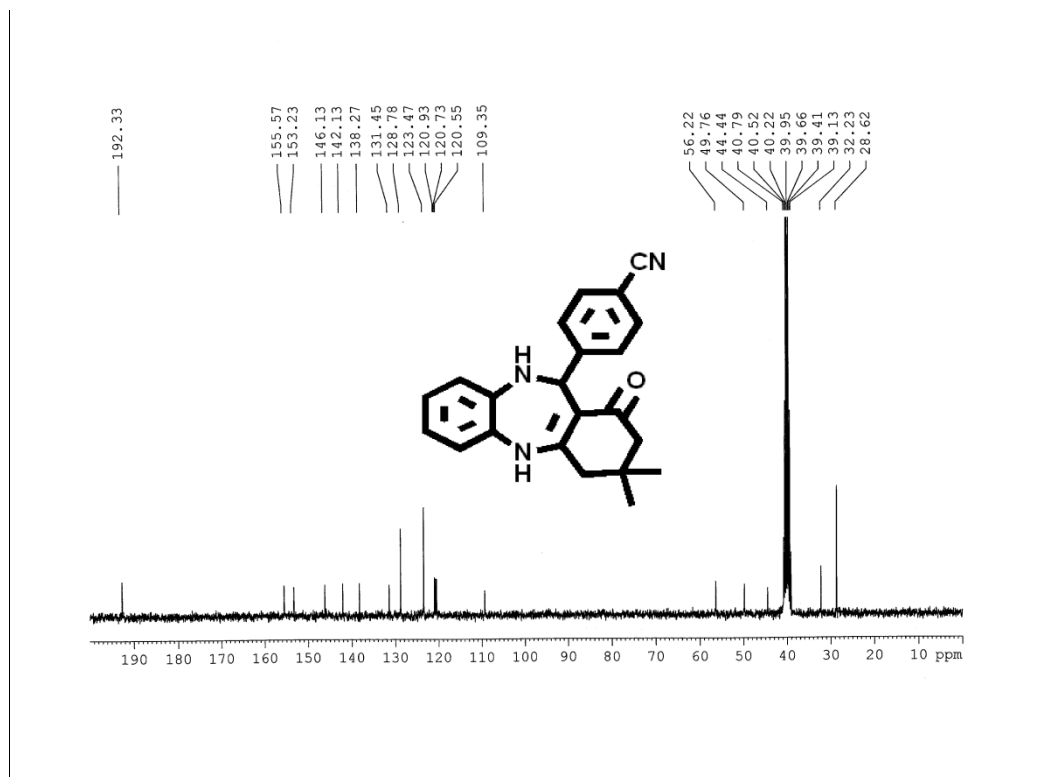

<sup>13</sup>C NMR spectra of compound **4f**

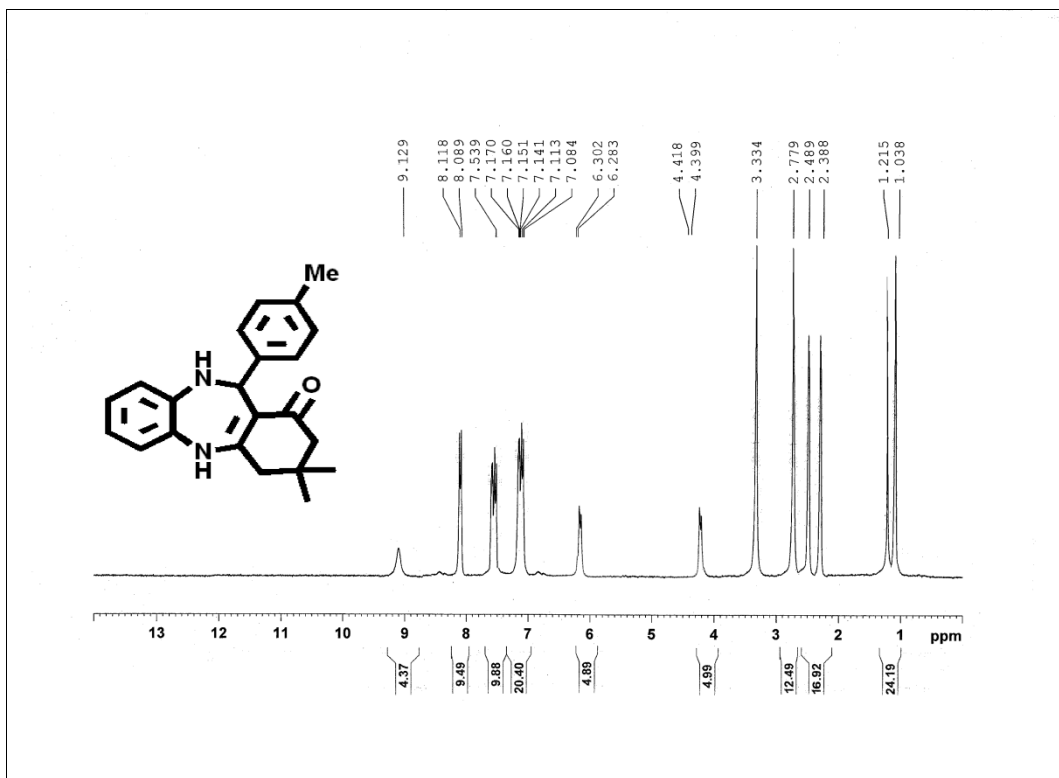

<sup>1</sup>H NMR spectra of compound 4g

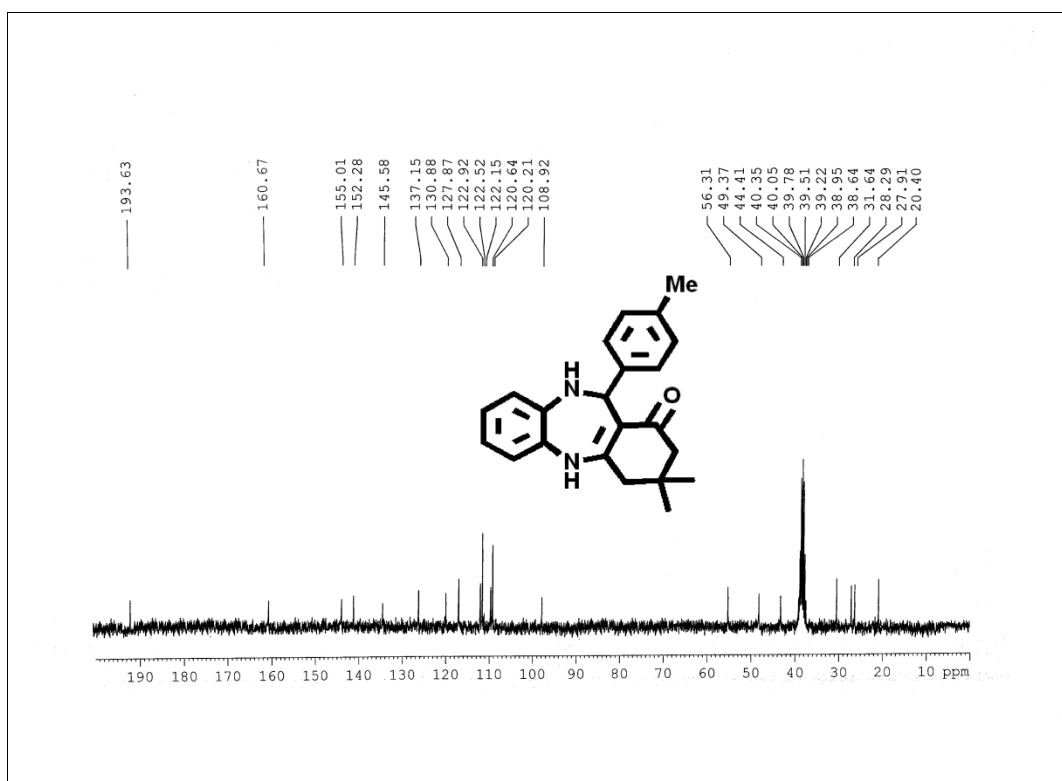

<sup>13</sup>C NMR spectra of compound 4g

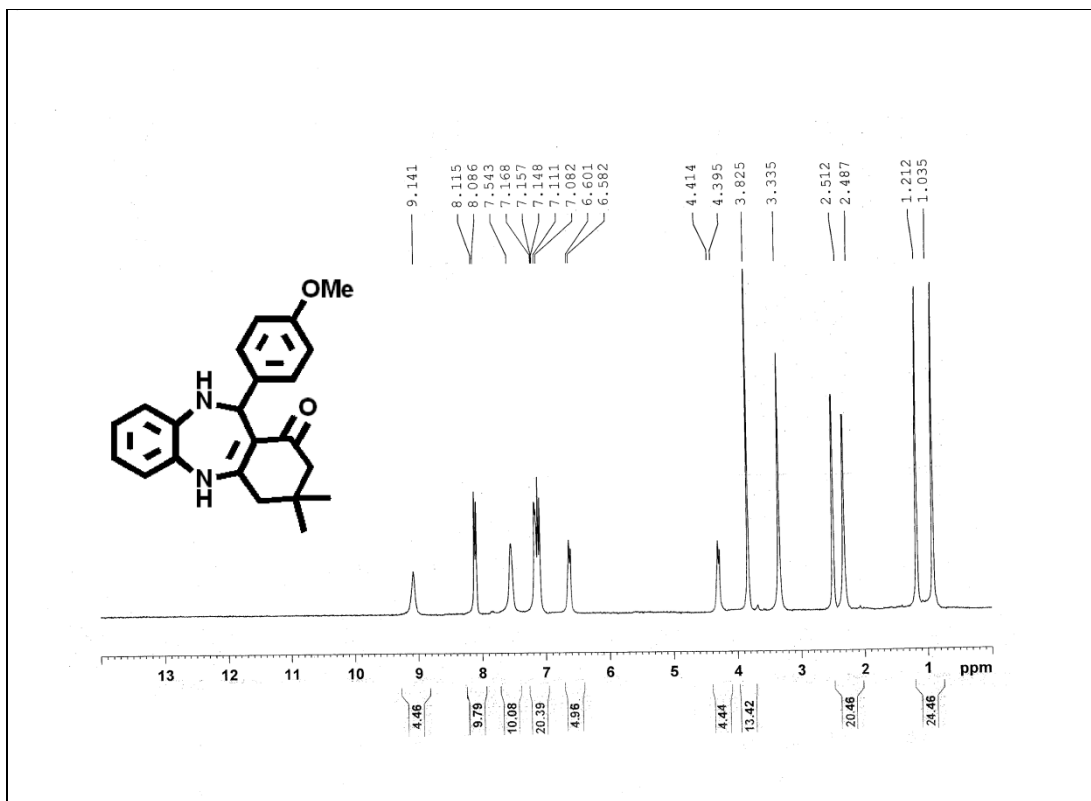

<sup>1</sup>H NMR spectra of compound **4h**

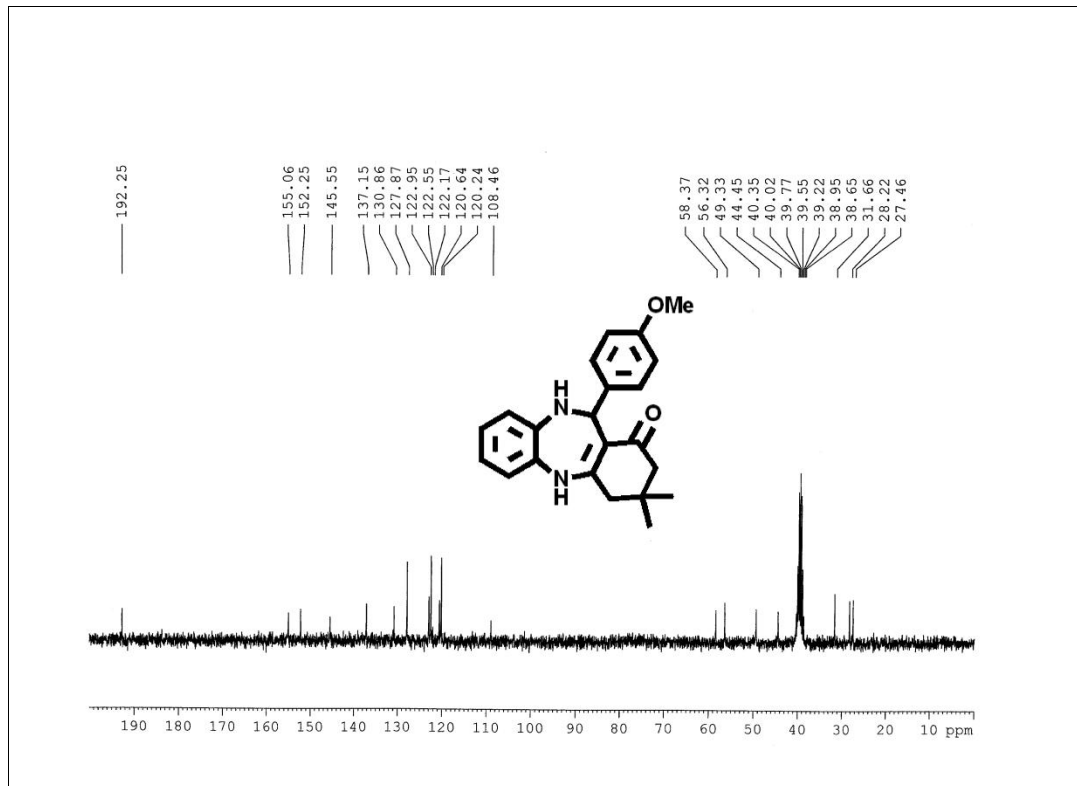

<sup>13</sup>C NMR spectra of compound **4h**

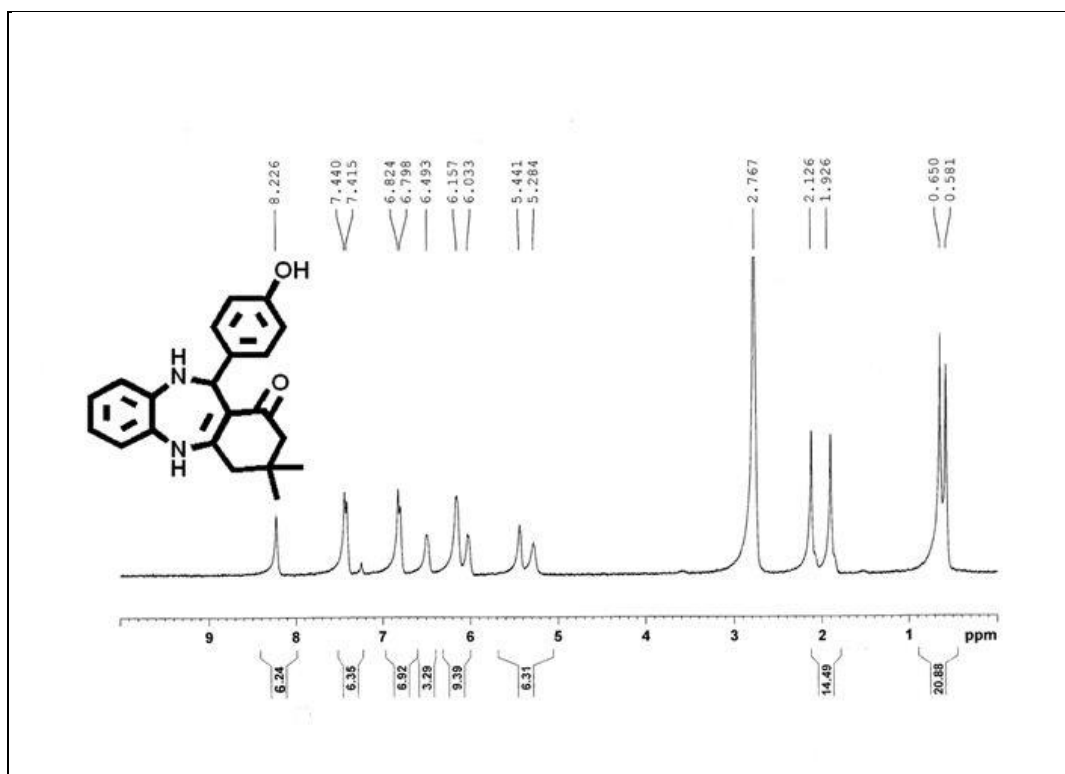

<sup>1</sup>H NMR spectra of compound 4i

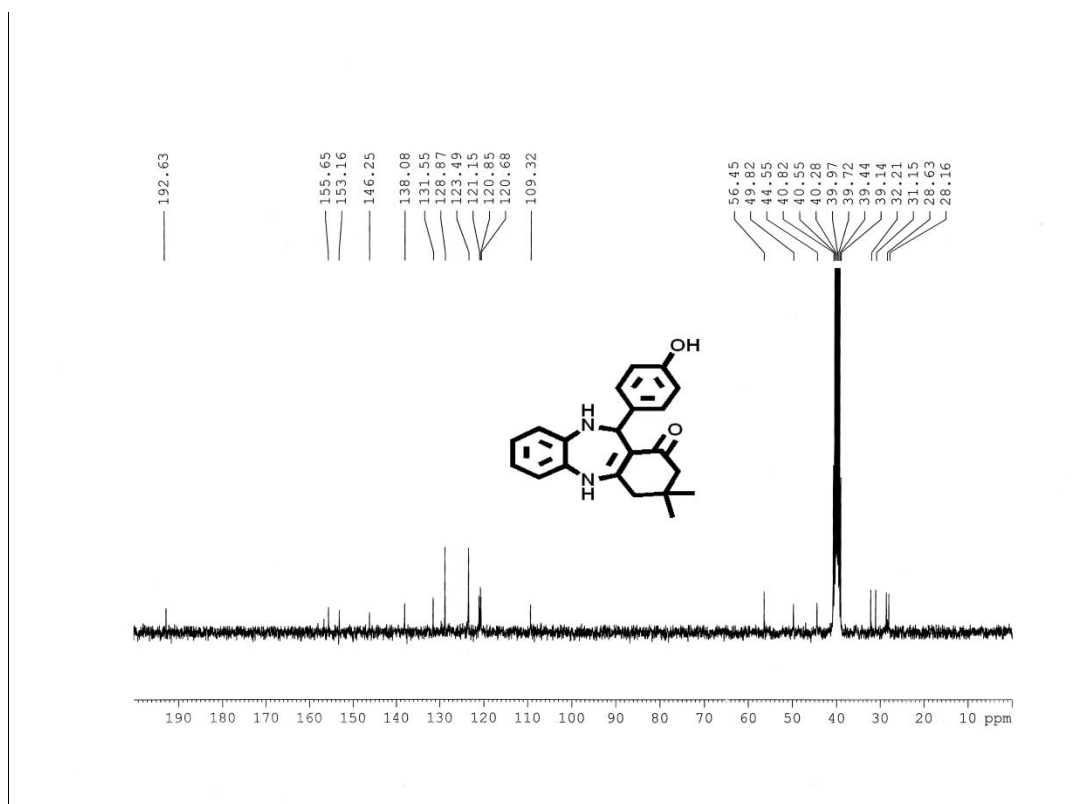

<sup>13</sup>C NMR spectra of compound 4i

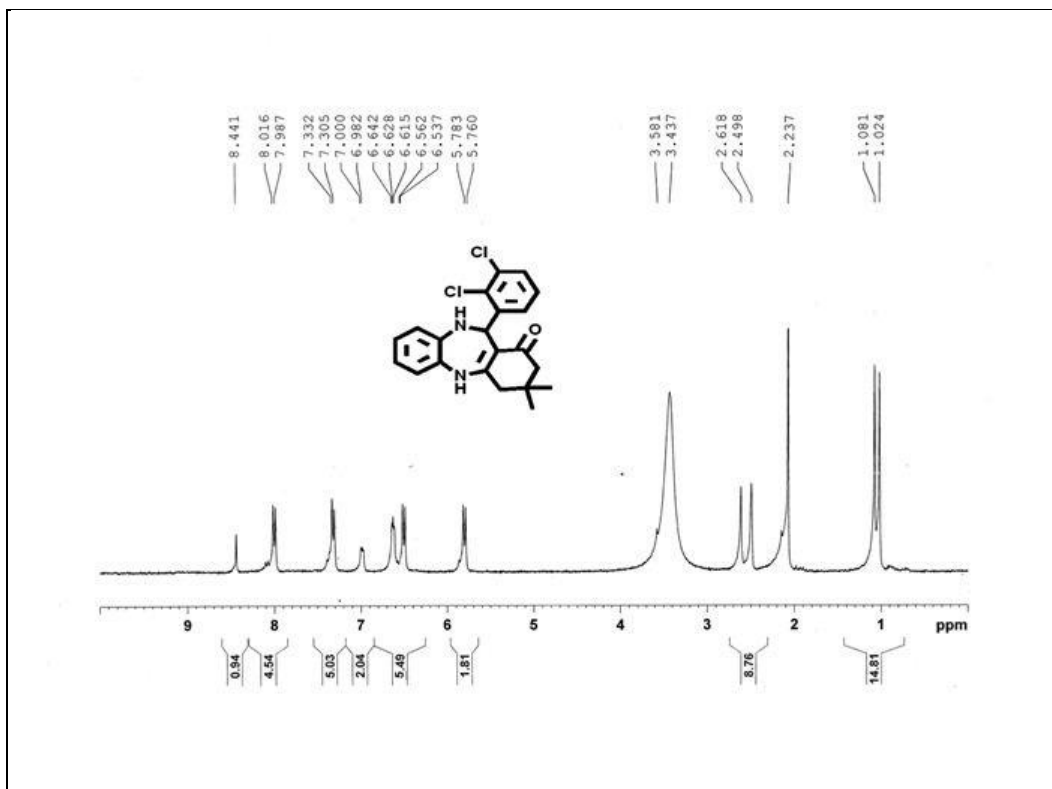

<sup>1</sup>H NMR spectra of compound **4j**

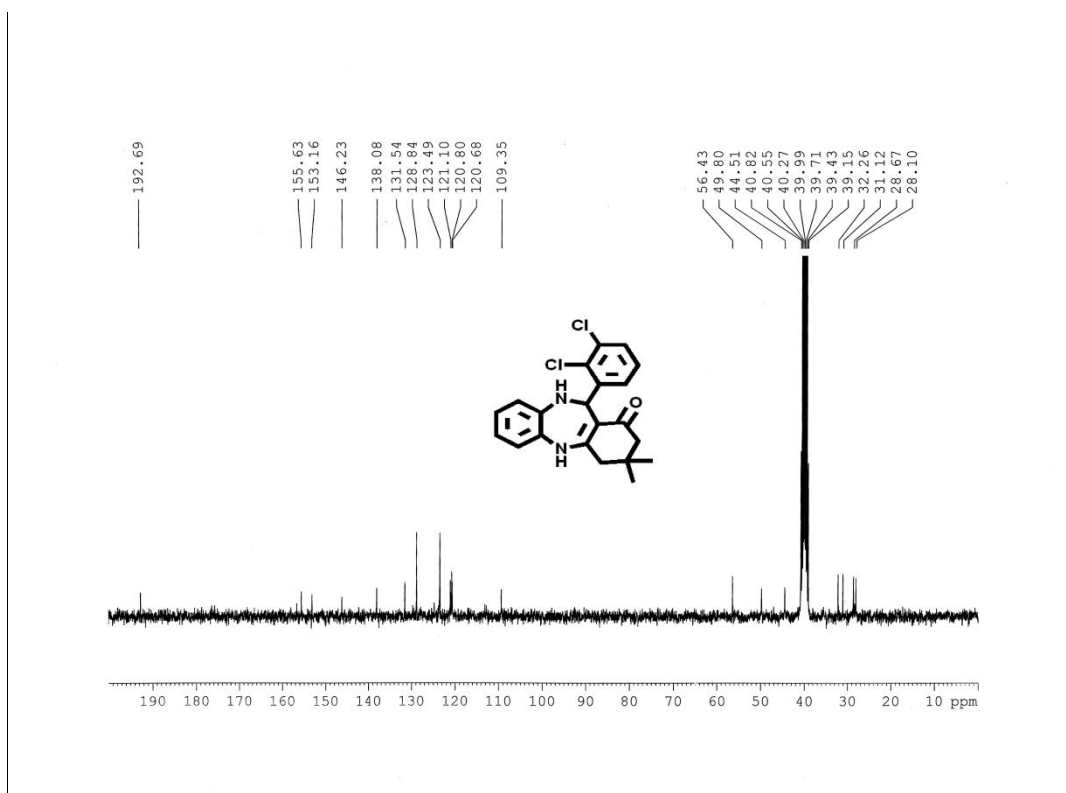

<sup>13</sup>C NMR spectra of compound **4j**

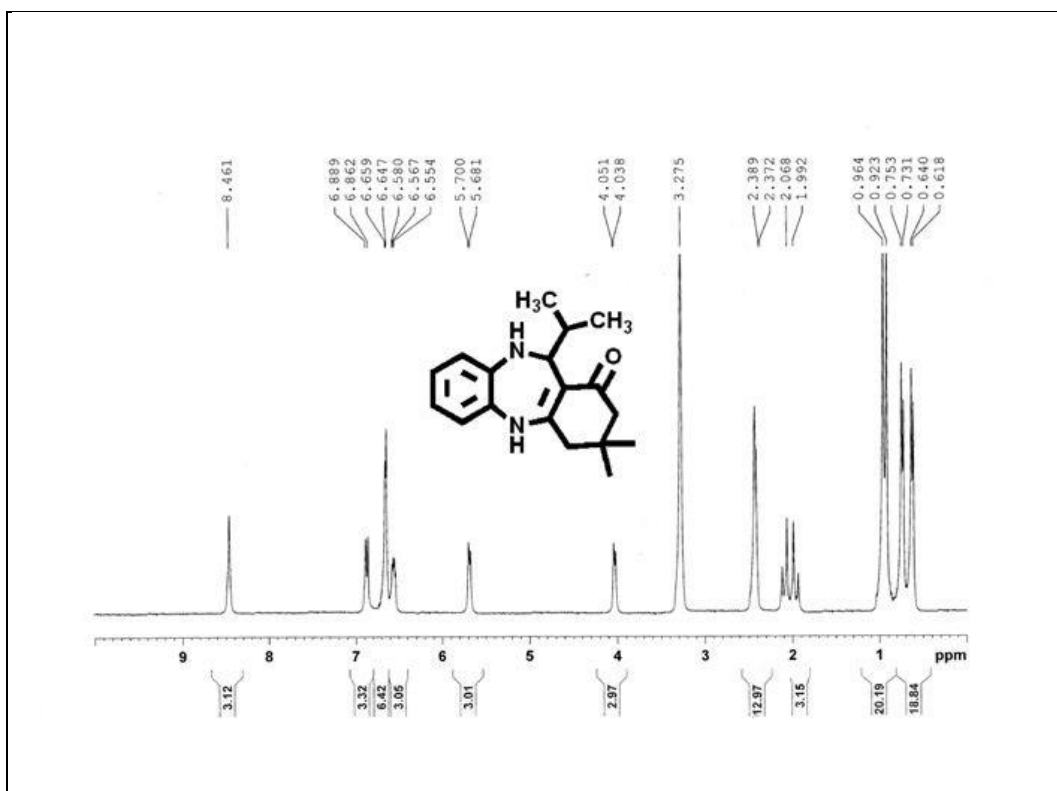

<sup>1</sup>H NMR spectra of compound **4k**

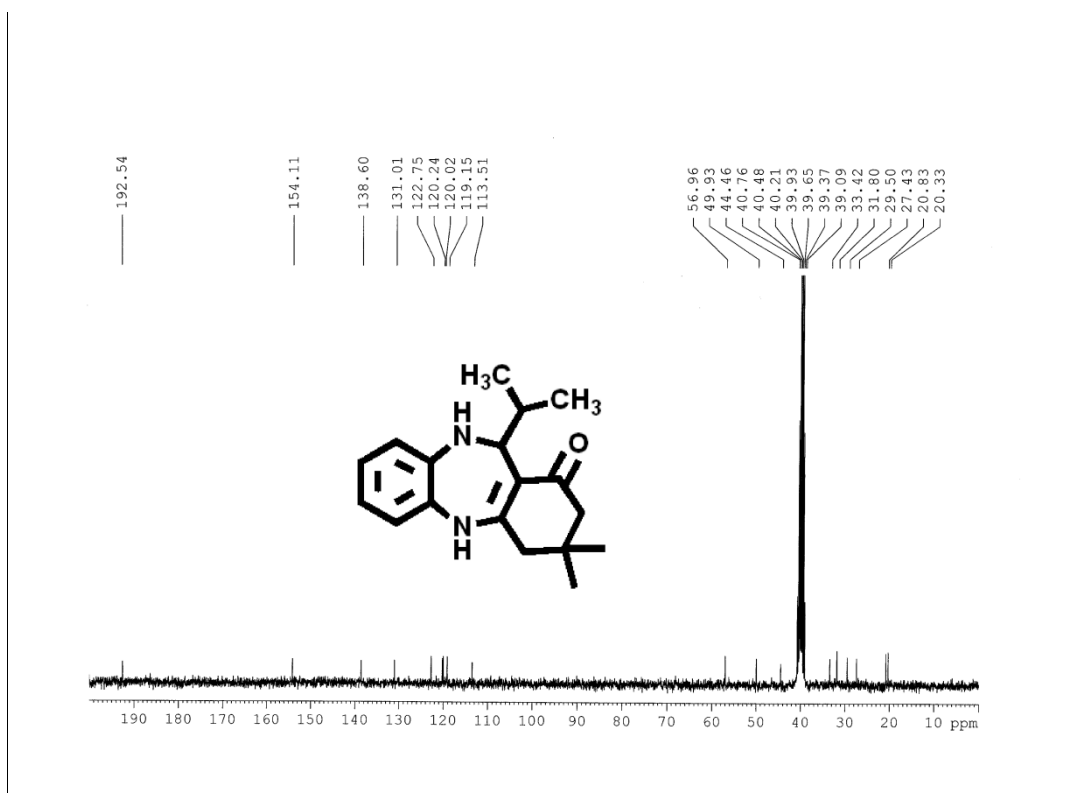

<sup>13</sup>C NMR spectra of compound **4k**

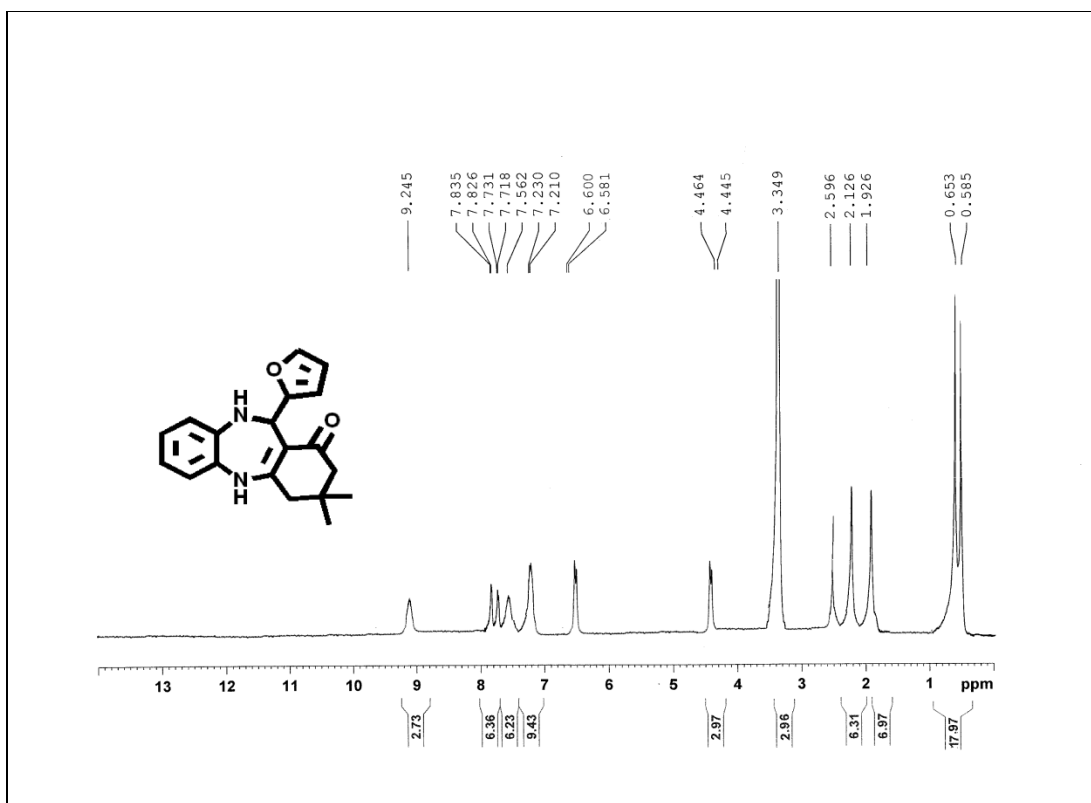

<sup>1</sup>H NMR spectra of compound **41**

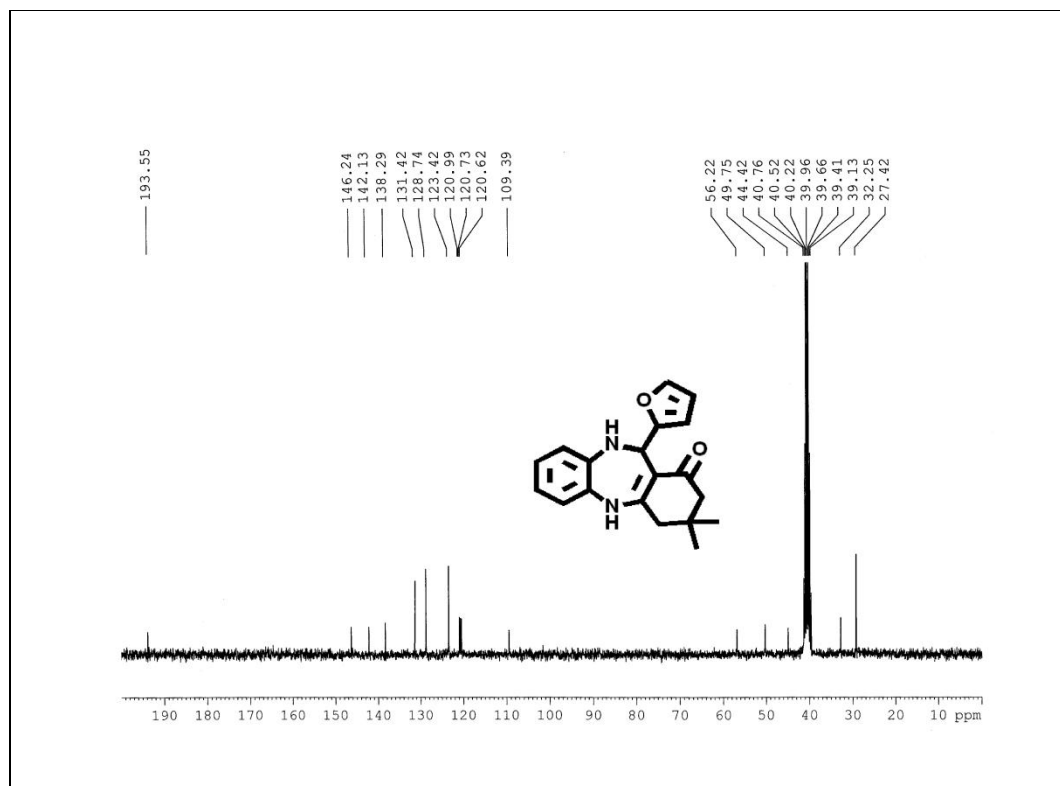

<sup>13</sup>C NMR spectra of compound **41**



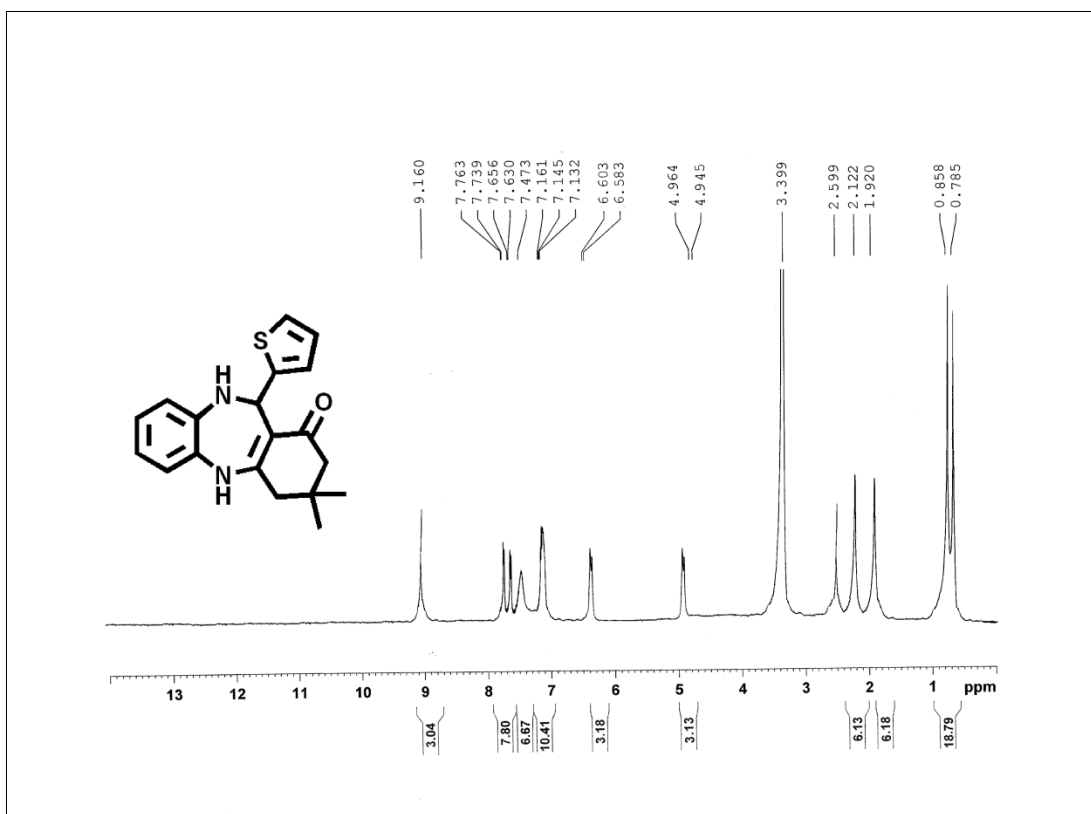

<sup>1</sup>H NMR spectra of compound **4m**

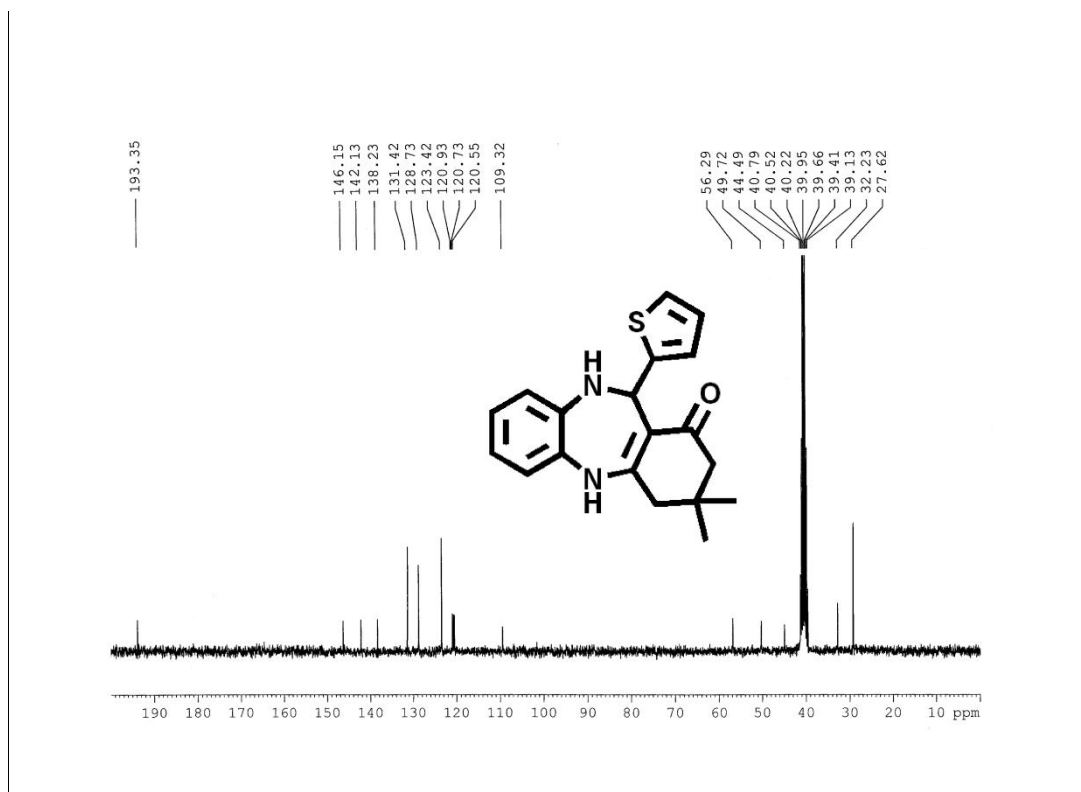

<sup>13</sup>C NMR spectra of compound **4m**

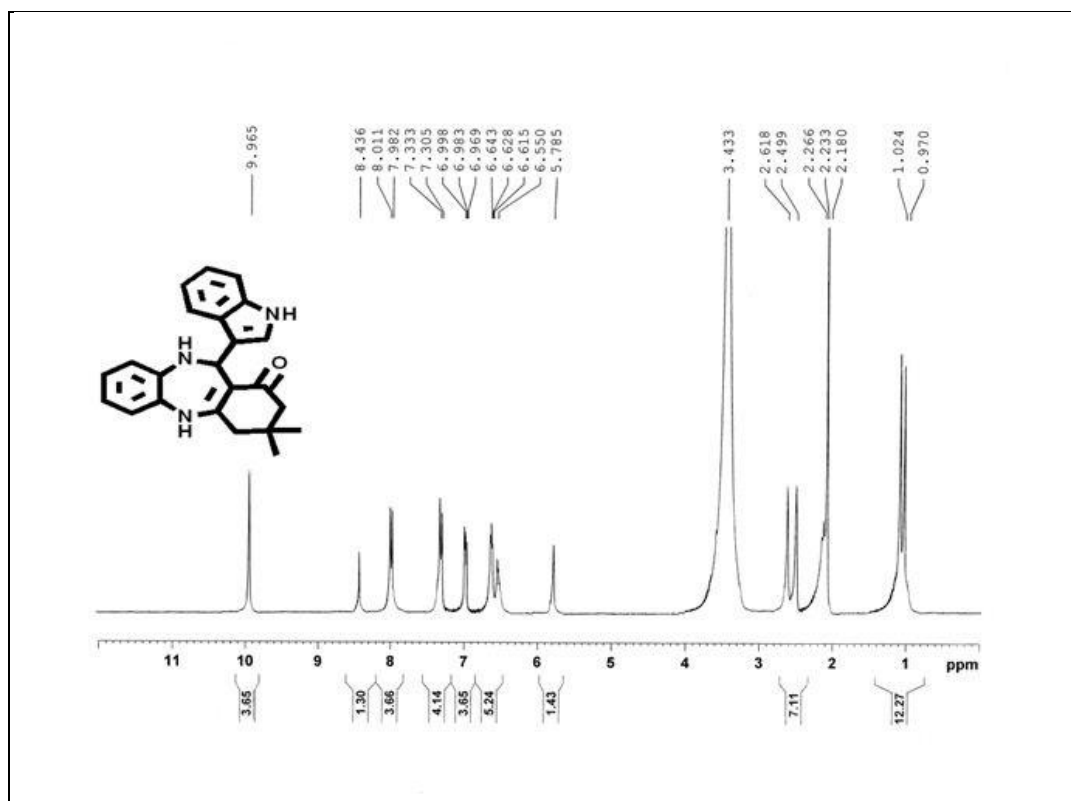

<sup>1</sup>H NMR spectra of compound **4n**

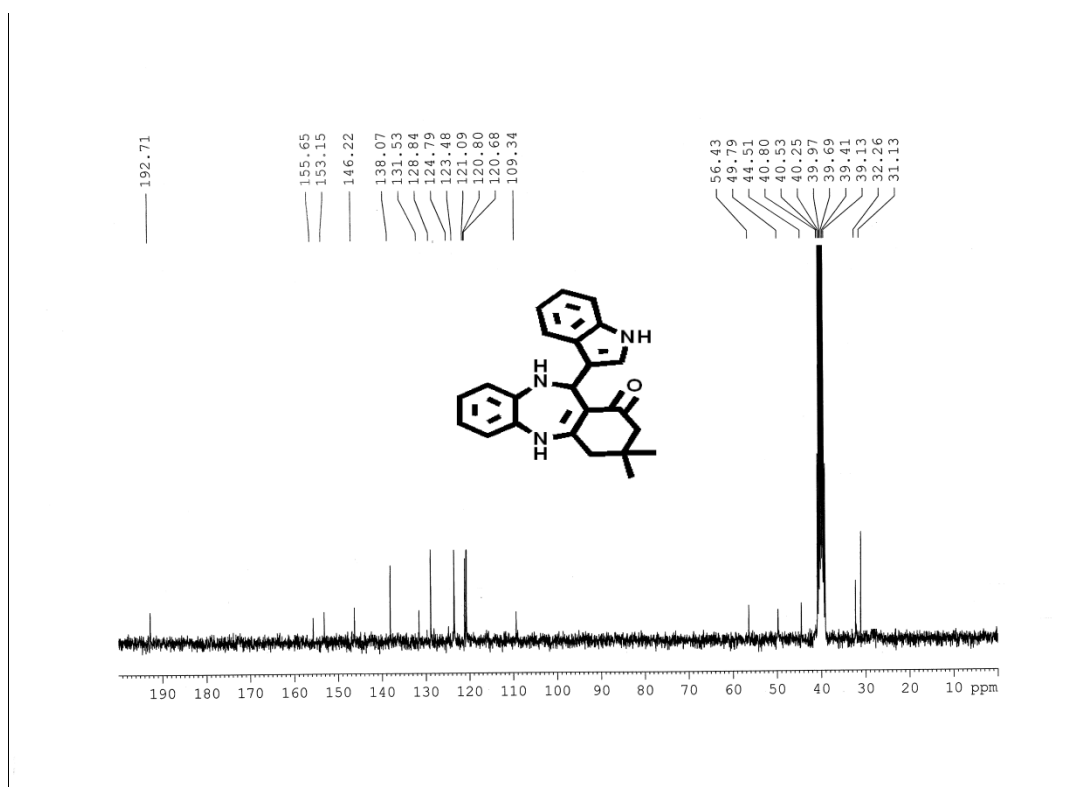

<sup>13</sup>C NMR spectra of compound **4n**

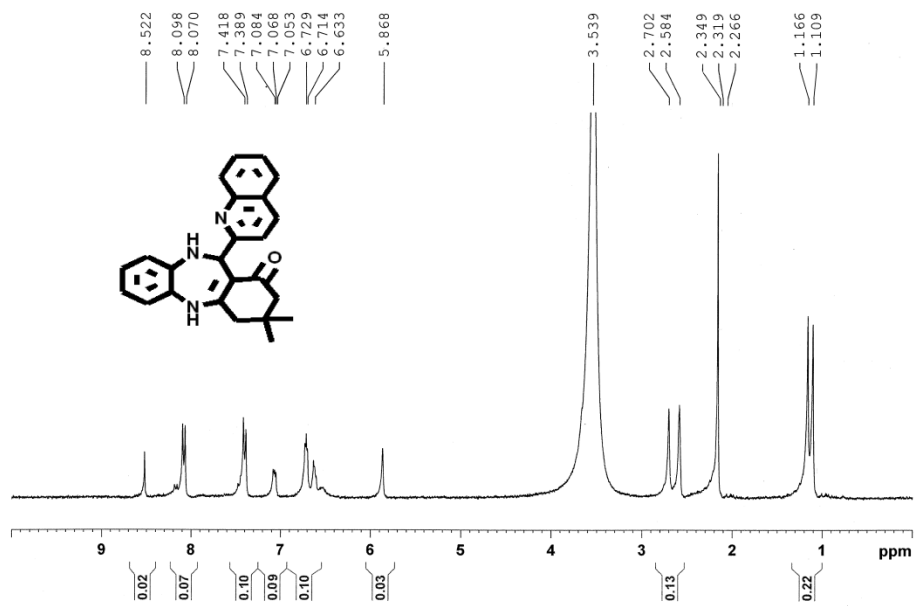

$^1\text{H}$  NMR spectra of compound **4o**

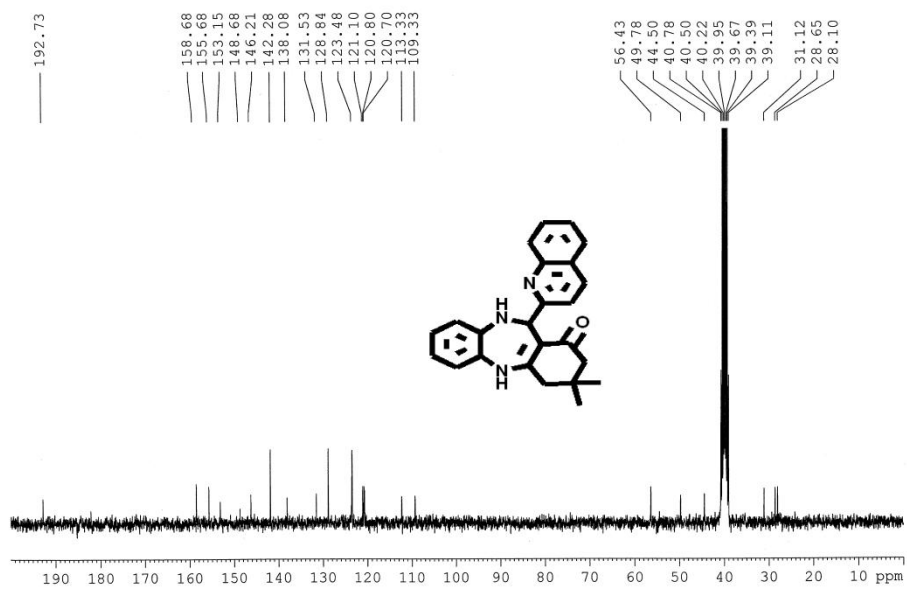

$^{13}\text{C}$  NMR spectra of compound **4o**

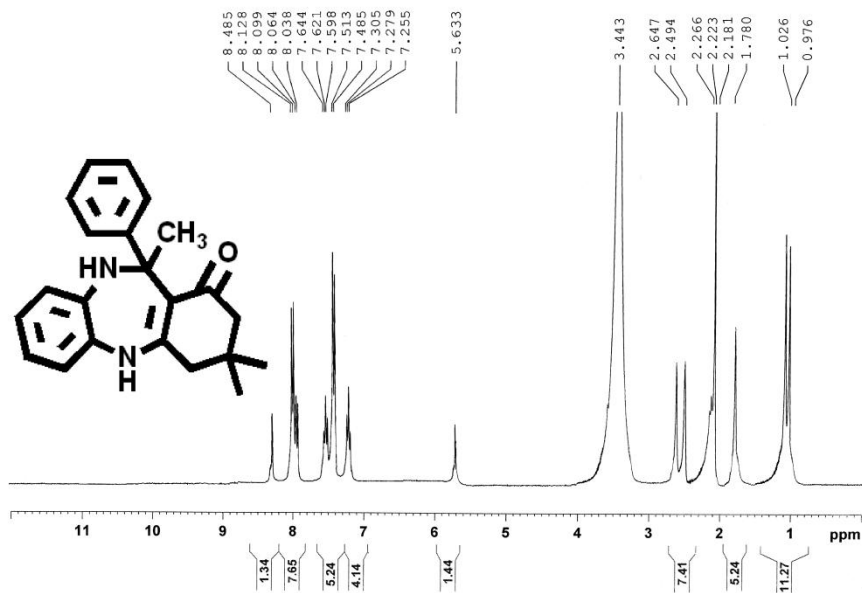

<sup>1</sup>H NMR spectra of compound 4p

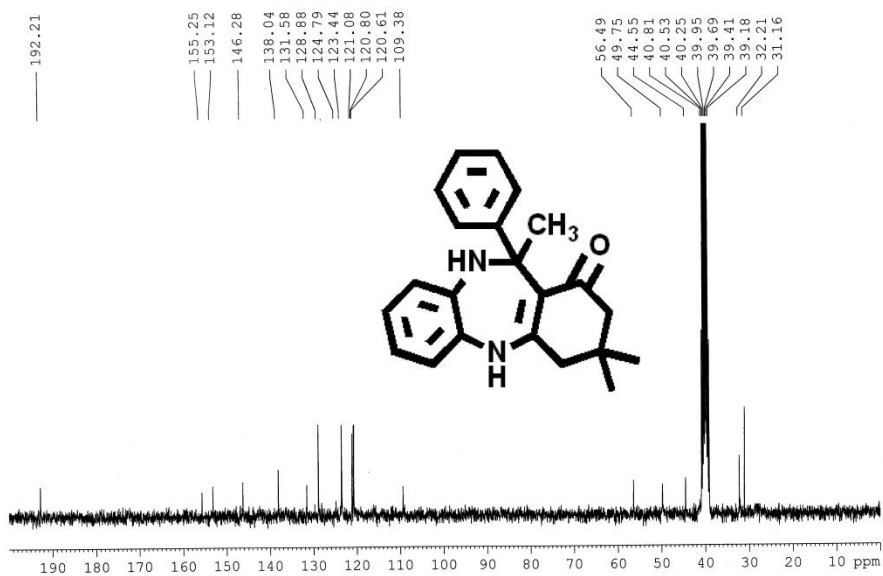

<sup>13</sup>C NMR spectra of compound 4p

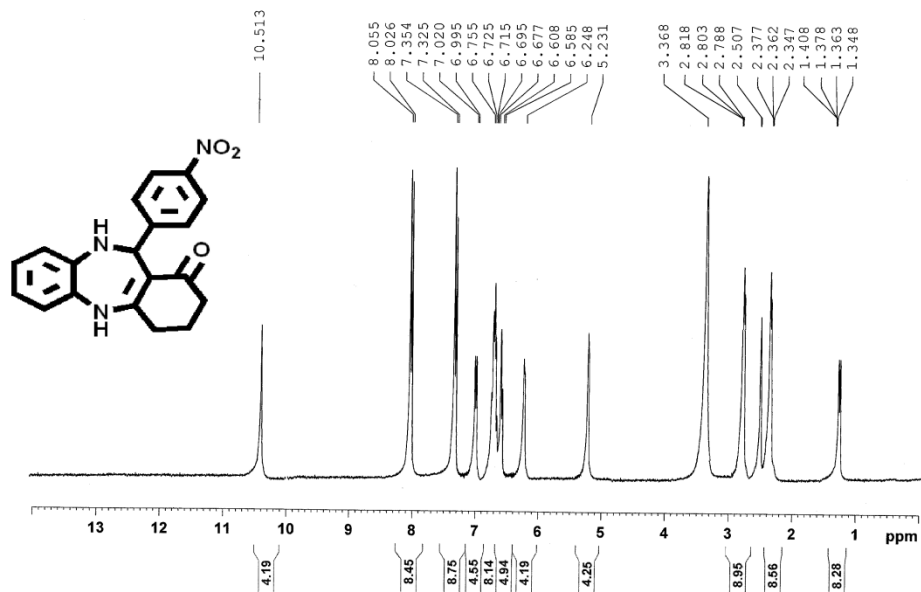

$^1\text{H}$  NMR spectra of compound **4q**

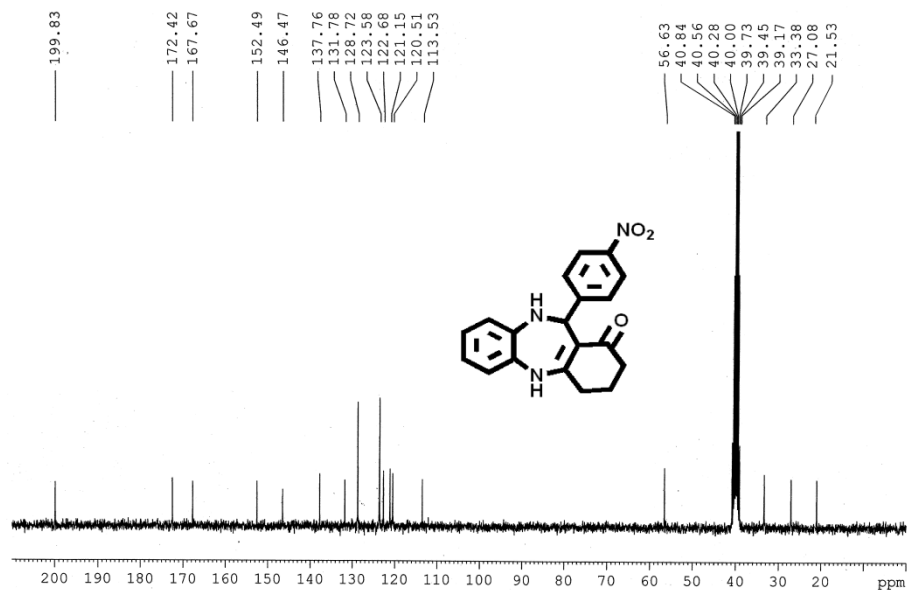

$^{13}\text{C}$  NMR spectra of compound **4q**

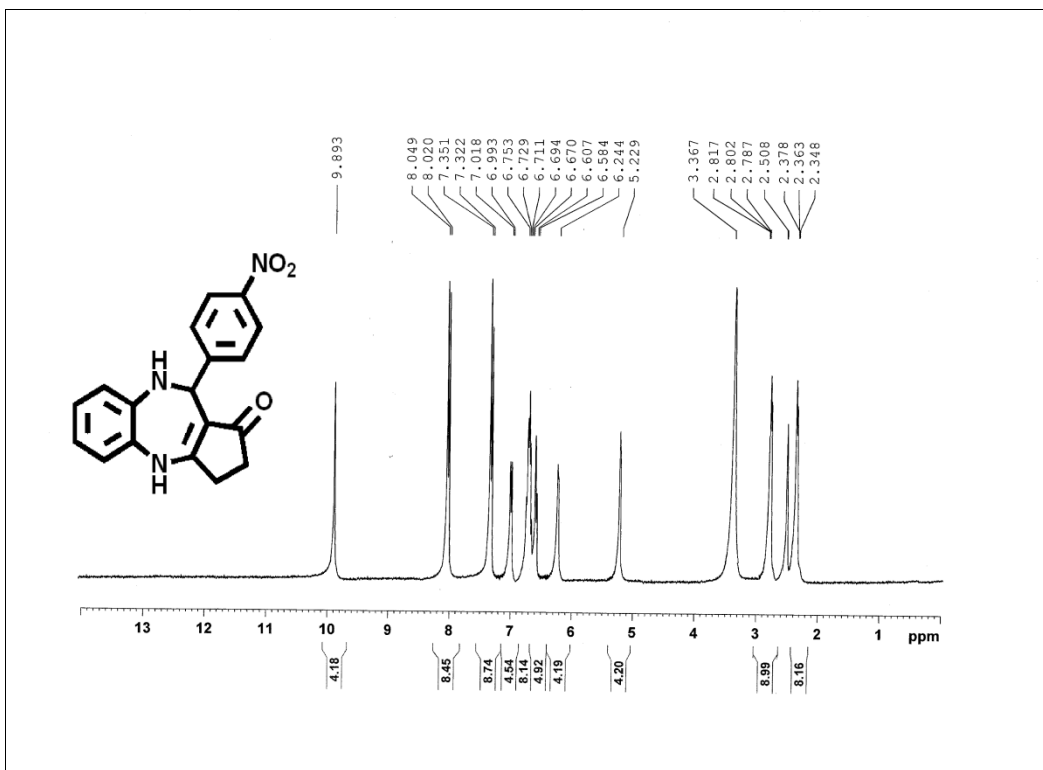

<sup>1</sup>H NMR spectra of compound **4r**

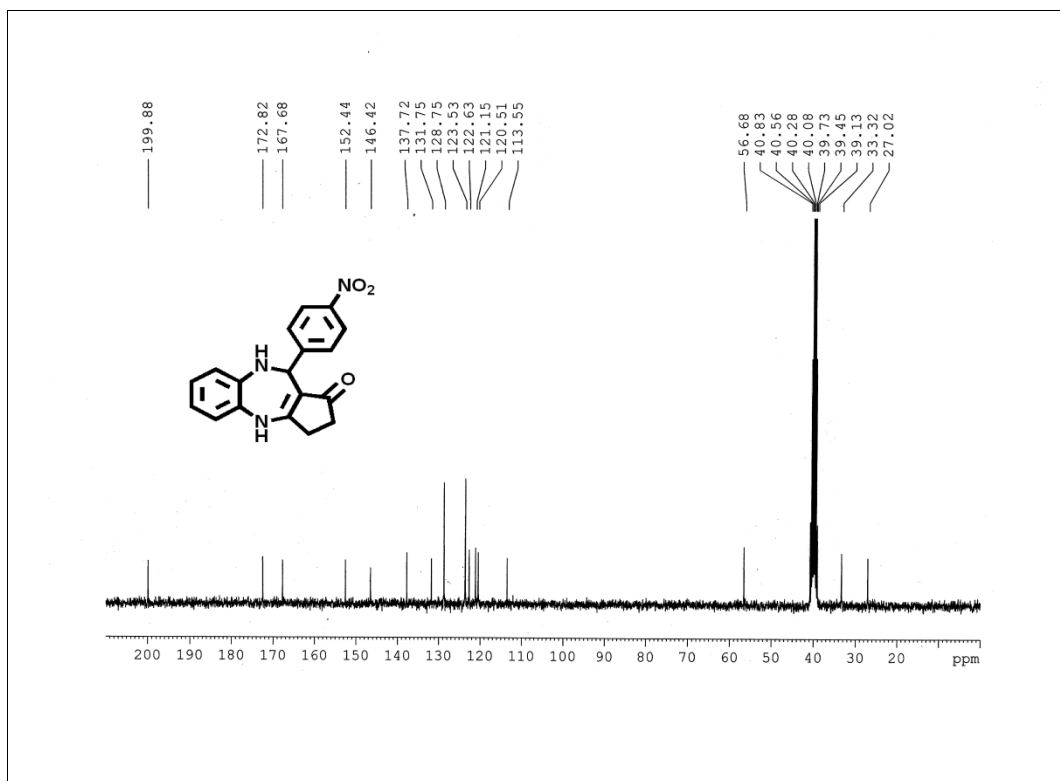

<sup>13</sup>C NMR spectra of compound **4r**

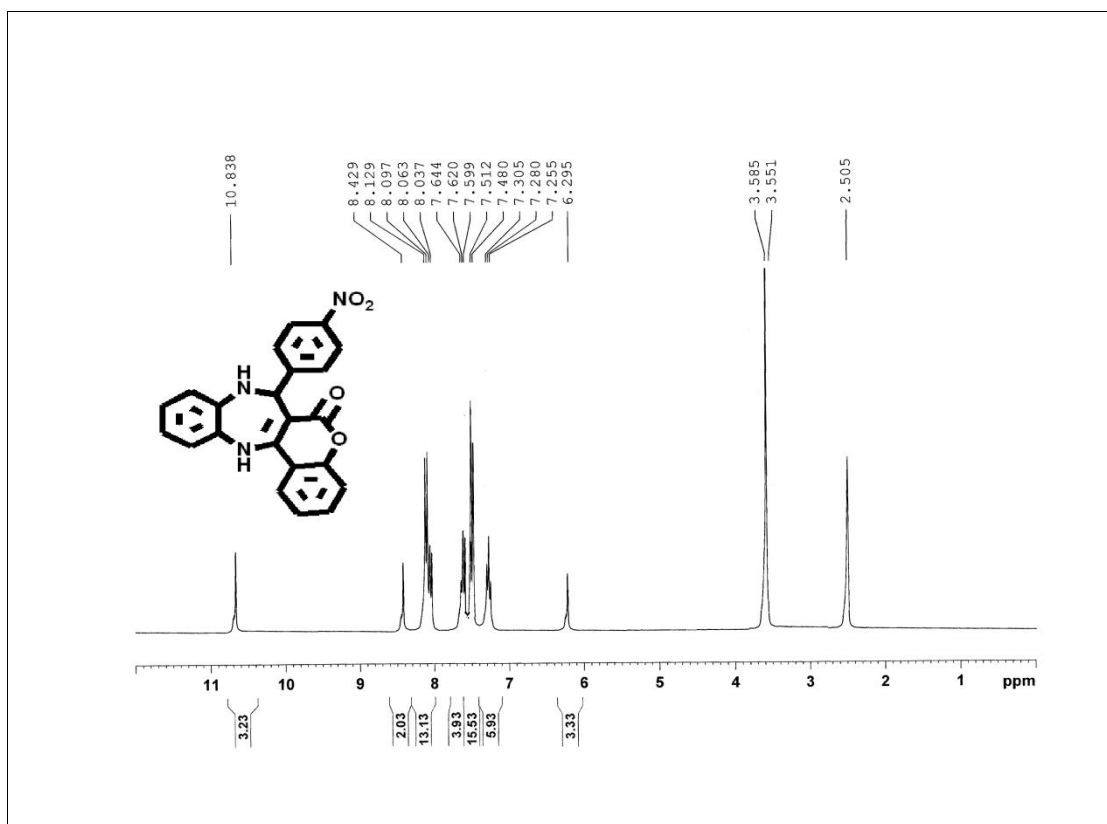

<sup>1</sup>H NMR spectra of compound 4s

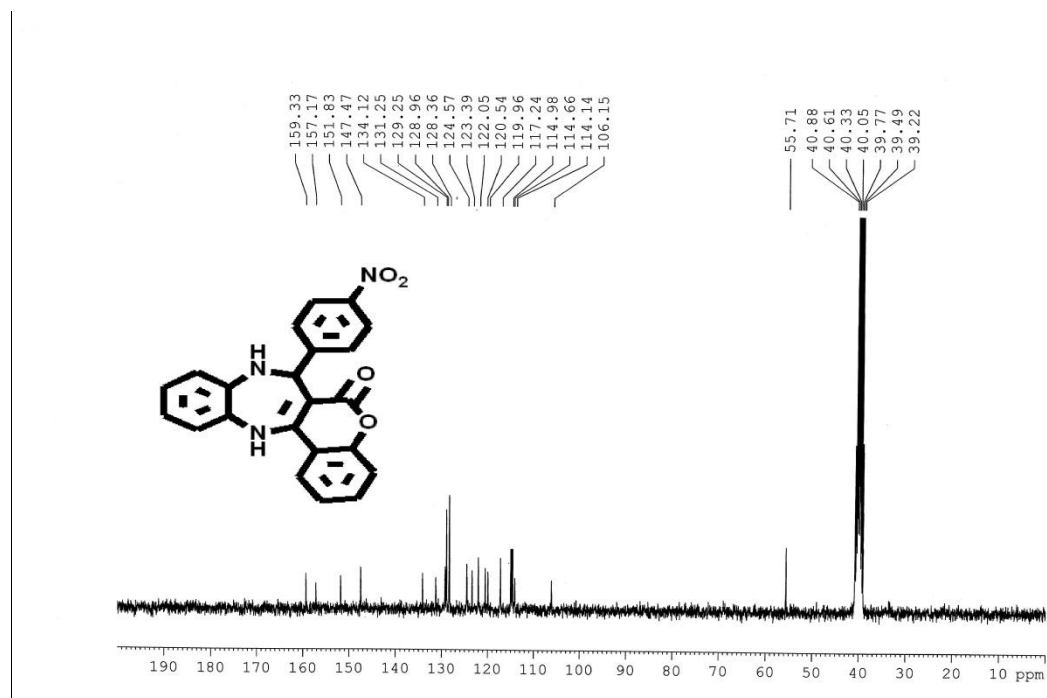

<sup>13</sup>C NMR spectra of compound 4s

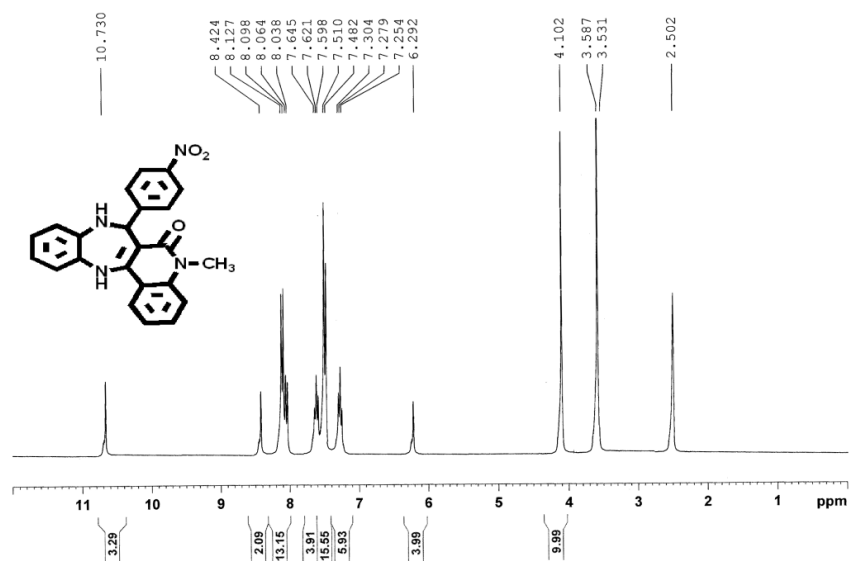

<sup>1</sup>H NMR spectra of compound **4t**

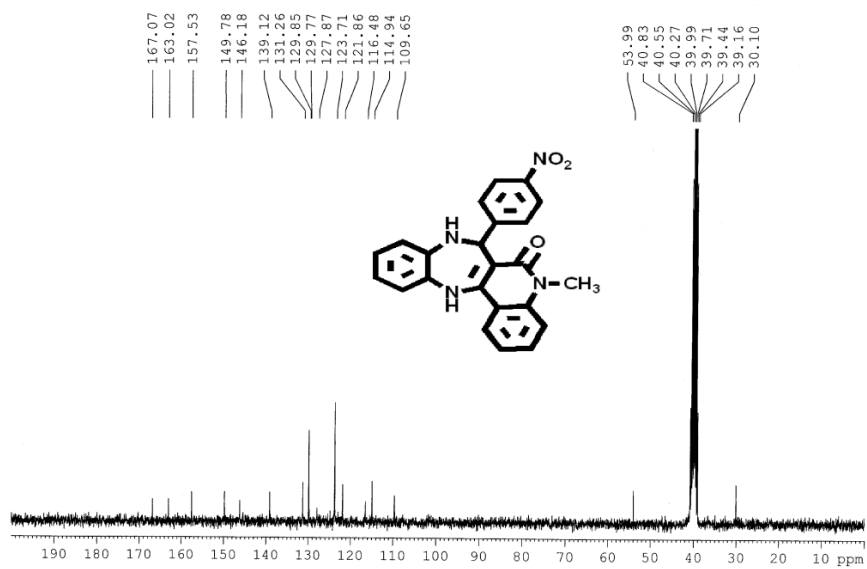

<sup>13</sup>C NMR spectra of compound **4t**



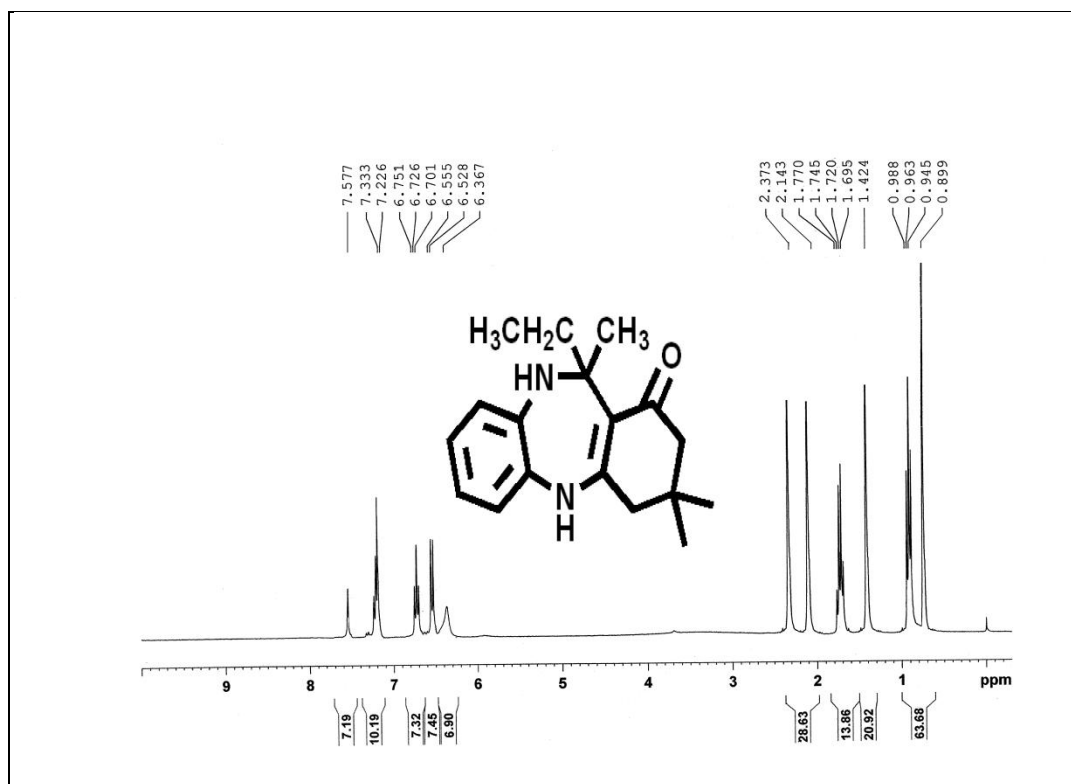

$^1\text{H}$  NMR spectra of compound **4u**

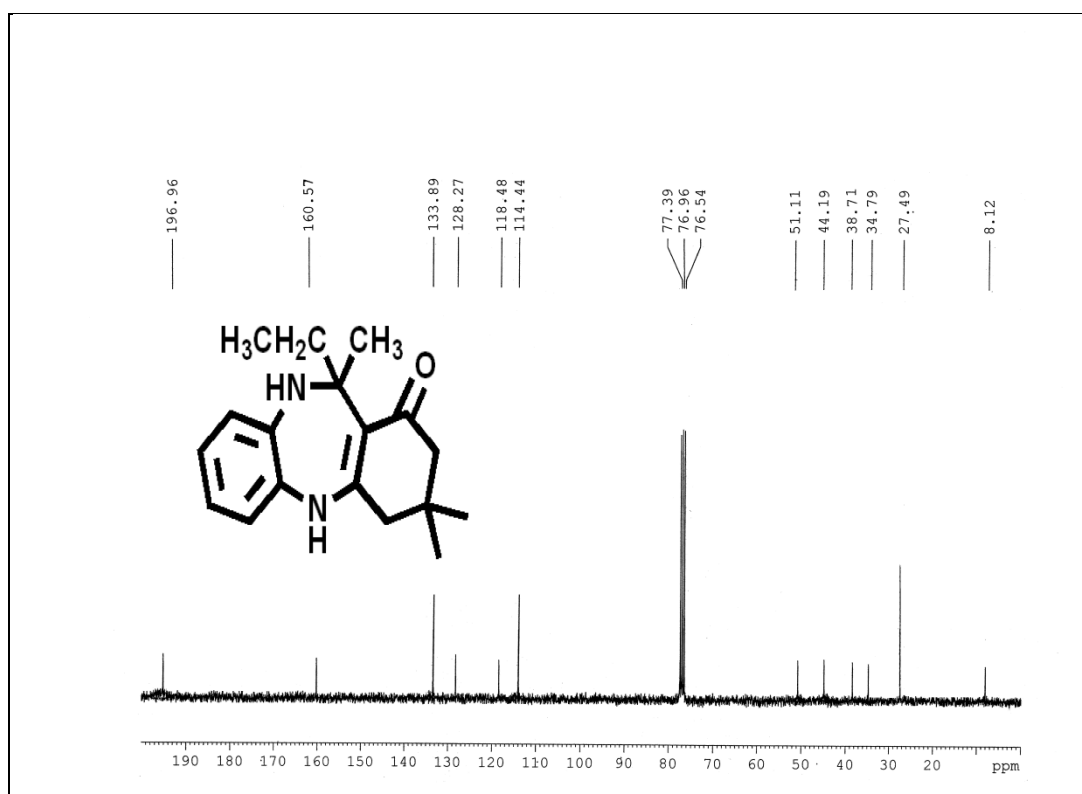

$^{13}\text{C}$  NMR spectra of compound **4u**

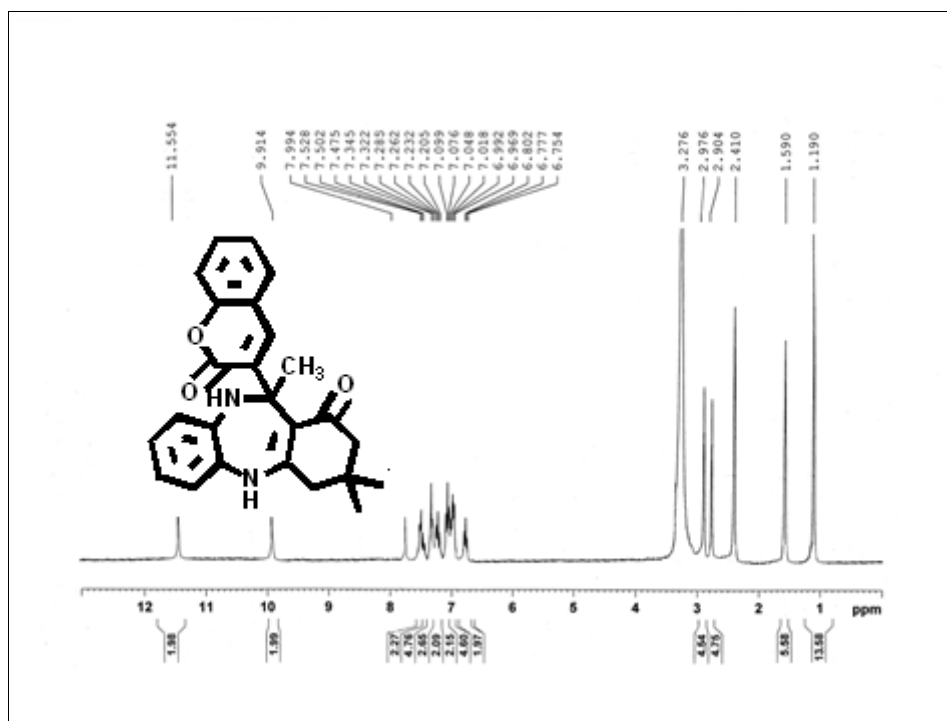

<sup>1</sup>H NMR spectra of compound **4v**

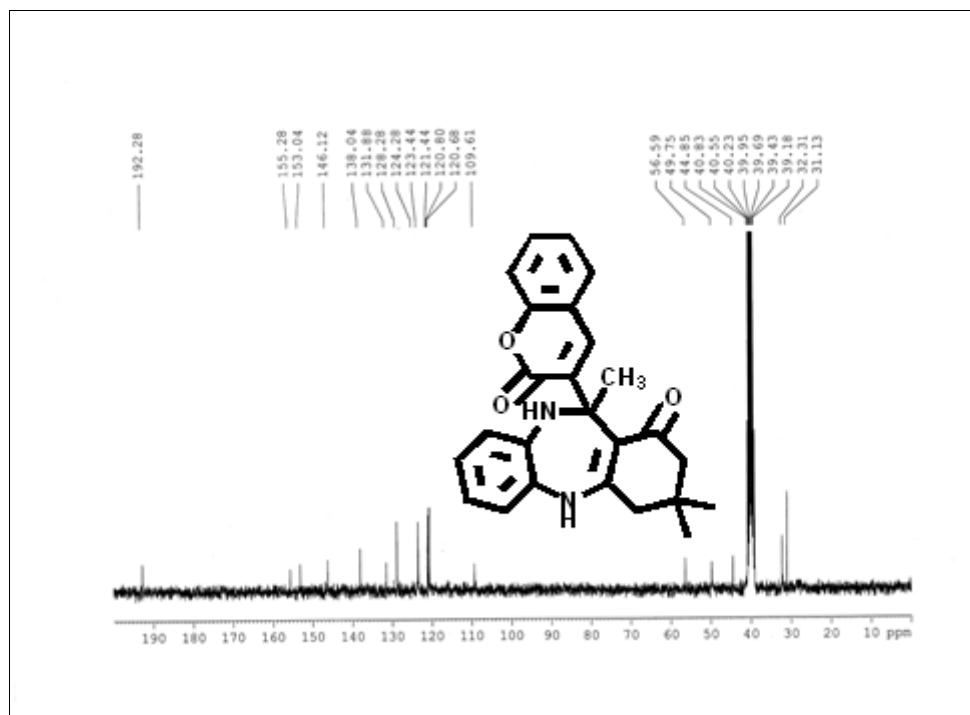

<sup>13</sup>C NMR spectra of compound **4v**

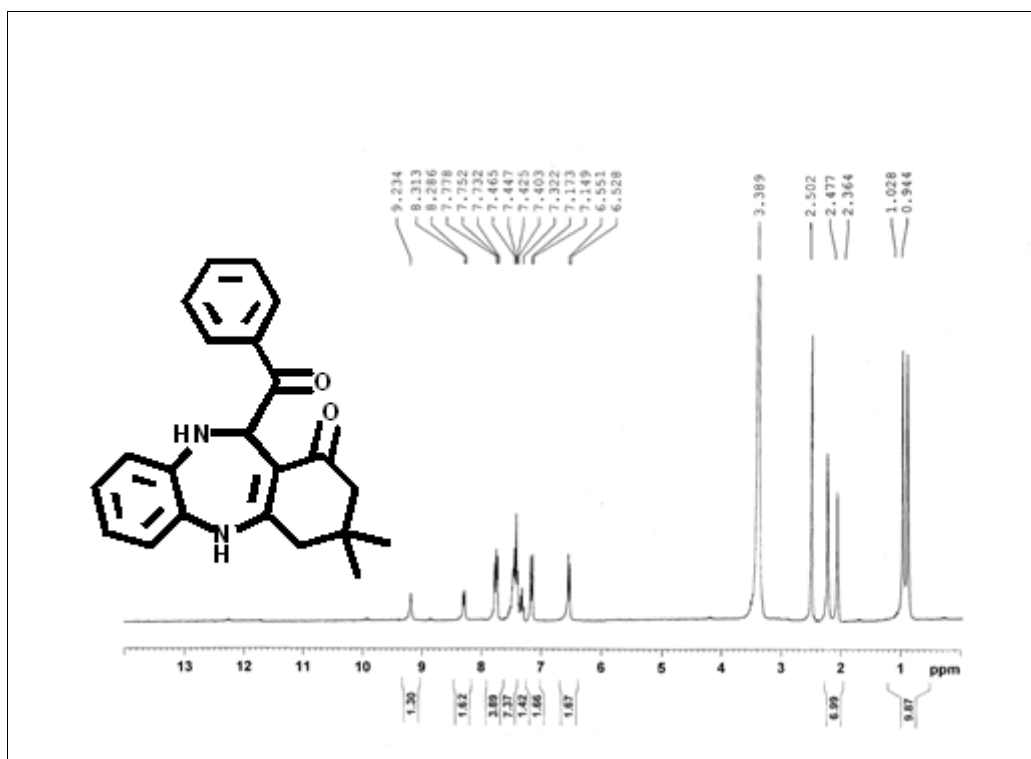

<sup>1</sup>H NMR of compound **4w**

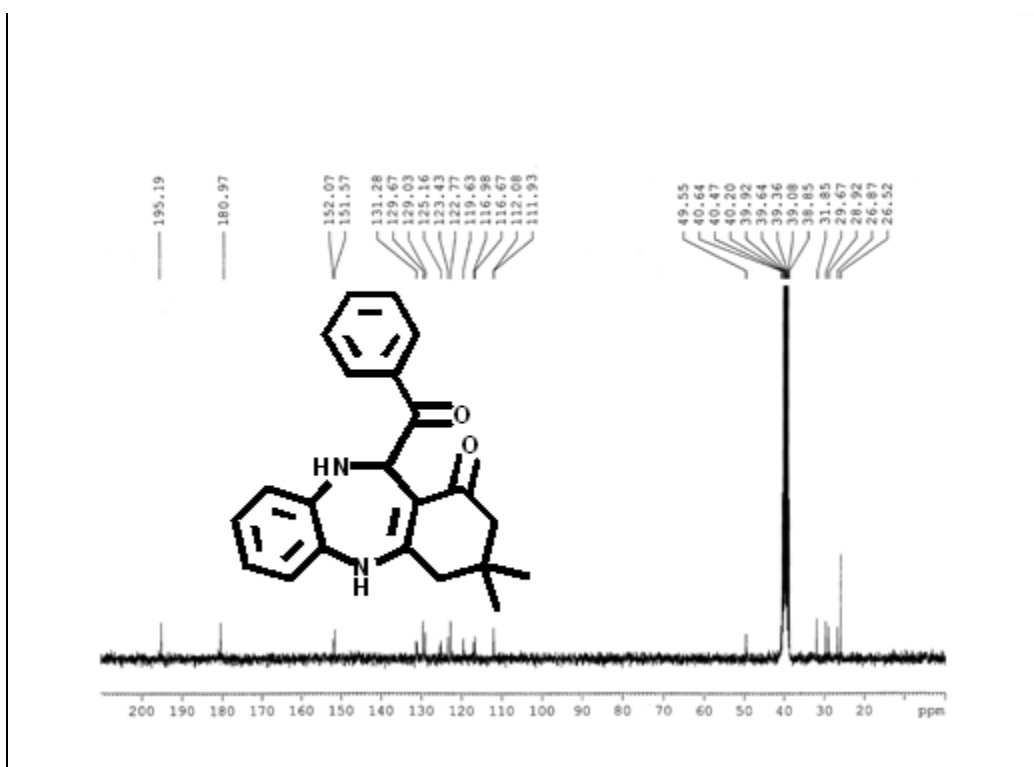

<sup>13</sup>C NMR of compound **4w**

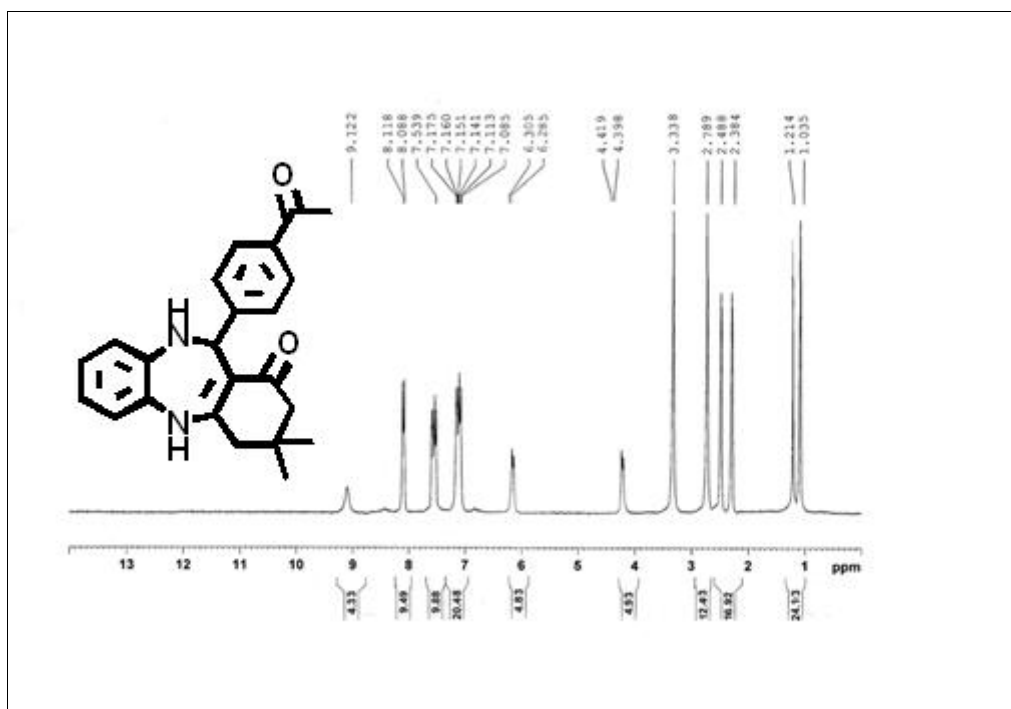

<sup>1</sup>H NMR of compound 4x

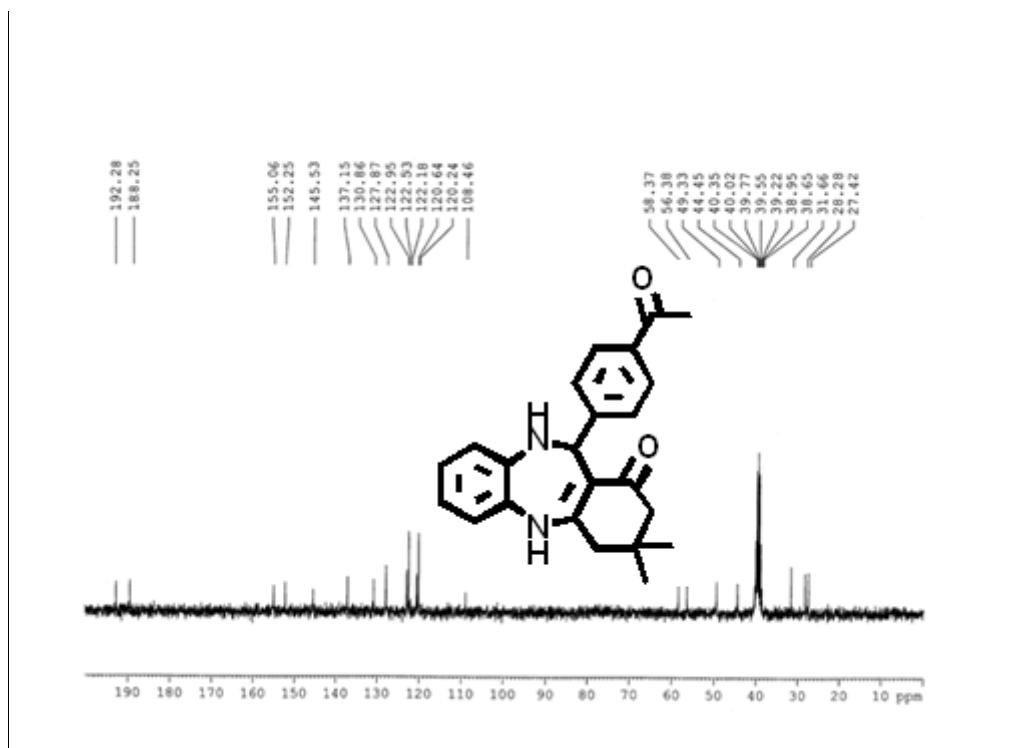

<sup>13</sup>C NMR of compound 4x

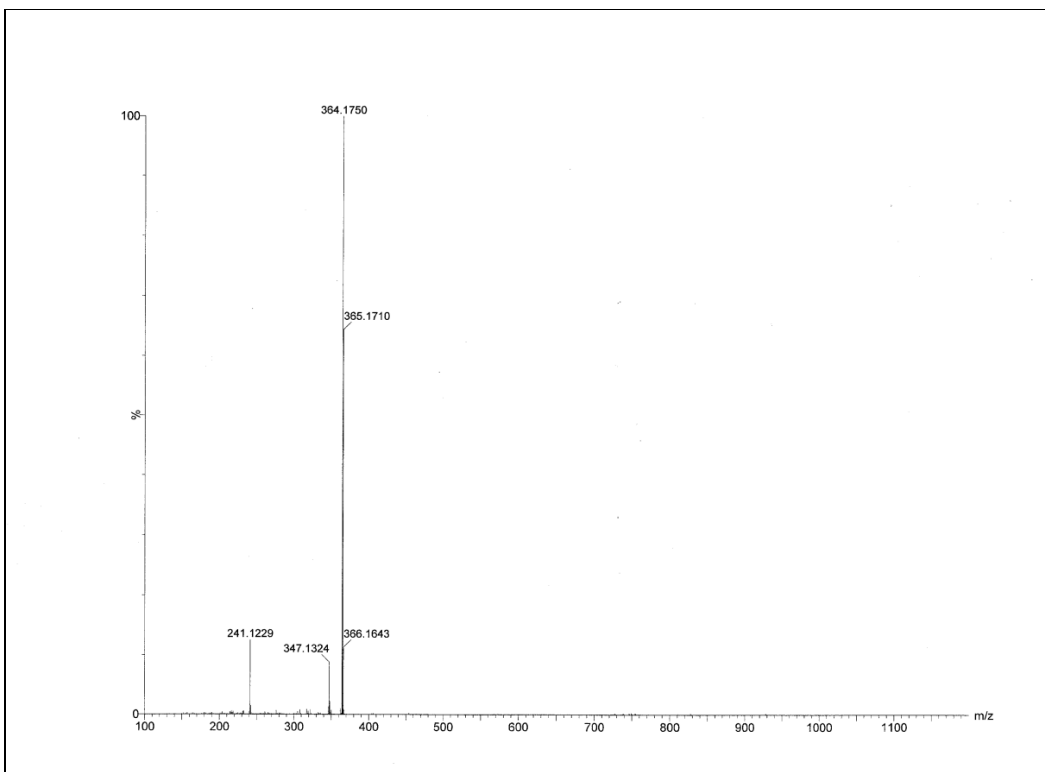

ESI-MS of compound **4c**

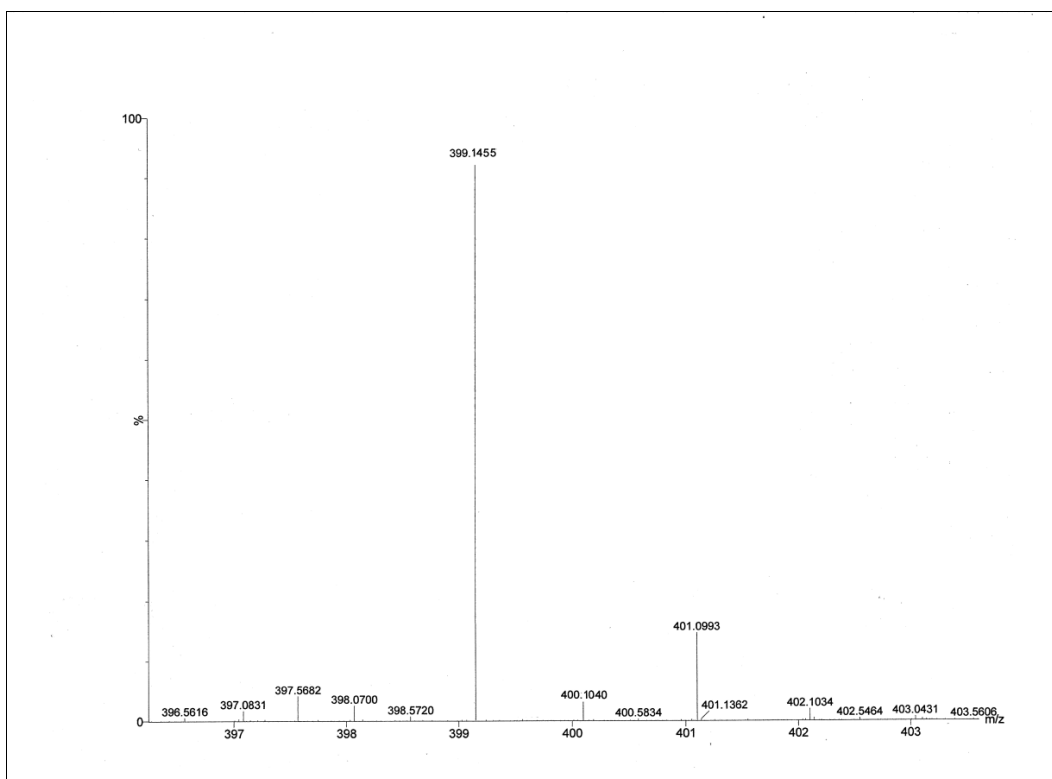

ESI-MS of compound **4t**
